1 **Dot1L interacts with Zc3h10 to activate UCP1 and other thermogenic genes**

2  
3 Danielle Yi<sup>1,2</sup>, Hai P. Nguyen<sup>1,2</sup>, Jennie Dinh<sup>1</sup>, Jose A. Viscarra<sup>1</sup>, Ying Xie<sup>1</sup>, Jon M.  
4 Dempersmier<sup>1</sup>, Yuhui Wang<sup>1</sup>, and Hei Sook Sul<sup>1,2,3</sup>

5  
6 Department of Nutritional Sciences & Toxicology<sup>1</sup>, Endocrinology Program<sup>2</sup>,  
7 University of California, Berkeley, CA 94720

8  
9 <sup>3</sup>Corresponding author: [hsul@berkeley.edu](mailto:hsul@berkeley.edu)

10  
11  
12  
13 **ABSTRACT**

14  
15 Brown adipose tissue is a metabolically beneficial organ capable of dissipating chemical  
16 energy into heat, thereby increasing energy expenditure. Here, we identify Dot1L, the only  
17 known H3K79 methyltransferase, as an interacting partner of Zc3h10 that transcriptionally  
18 activates the UCP1 promoter and other BAT genes. Through a direct interaction, Dot1L is  
19 recruited by Zc3h10 to the promoter regions of thermogenic genes to function as a coactivator  
20 by methylating H3K79. We also show that Dot1L is induced during brown fat cell differentiation  
21 and by cold exposure and that Dot1L and its H3K79 methyltransferase activity is required for  
22 thermogenic gene program. Furthermore, we demonstrate that Dot1L ablation in mice using  
23 UCP1-Cre prevents activation of UCP1 and other target genes to reduce thermogenic capacity  
24 and energy expenditure, promoting adiposity. Hence, Dot1L plays a critical role in the  
25 thermogenic program and may present as a future target for obesity therapeutics.

27

28

## INTRODUCTION

29 Adipose tissue has a central role in controlling mammalian energy metabolism in that,  
30 while white adipose tissue (WAT) is to store excess calories, brown adipose tissue (BAT) is to  
31 dissipate energy via non-shivering thermogenesis (Cannon and Nedergaard, 2004). Classic  
32 brown adipocytes contain a high density of mitochondria that contain Uncoupling protein 1  
33 (UCP1), which uncouples respiration from ATP synthesis and generates heat instead (Farmer,  
34 2008, Cannon and Nedergaard, 2004). In addition, beige/brite adipocytes in WAT depot are  
35 recruited upon cold exposure or  $\beta_3$ -adrenergic stimulation (Seale et al., 2008, Wang and Seale,  
36 2016, Sanchez-Gurmaches et al., 2016, Cypess et al., 2009, Lichtenbelt et al., 2009, Virtanen et  
37 al., 2009, Chondronikola et al., 2014). Based on several cross-sectional studies, adult human  
38 brown fat or brown fat-like tissue is inversely correlated with body mass index and visceral fat  
39 (Lichtenbelt et al., 2009, Hibi et al., 2016, Jimenez et al., 2007). Therefore, unraveling the  
40 mechanisms underlying the thermogenic gene program has drawn growing attention in obesity  
41 research as a promising avenue to combat obesity and associated metabolic diseases.

42 One of the major advances in BAT biology has been understanding the transcription  
43 network that governs the thermogenic gene program and finding critical factors that activate the  
44 UCP1 gene. A multitude of transcriptional regulators have been implicated in the transcription of  
45 UCP1, including transcription factors, Zfp516, IRF4 and EBF2, and transcriptional coregulators,  
46 PRDM16, PGC1 $\alpha$  and LSD1 (Seale et al., 2008, Rajakumari et al., 2013, Dempersmier et al.,  
47 2015, Puigserver et al., 1998, Sambeat et al., 2016, Kong et al., 2014). Recently, we identified a  
48 BAT-enriched and cold-induced transcription factor, Zc3h10 that activates the UCP1 and other  
49 target genes, such as Tfam and Nrf1 for mitochondrial biogenesis (Yi et al., 2019). Zc3h10  
50 activates the UCP1 promoter by directly binding to the -4.6 kb region. Upon sympathetic  
51 stimulation, Zc3h10 is phosphorylated at S126 by p38 mitogen-activated protein kinase (MAPK)

52 to increase binding to this distal region of the UCP1 promoter. Consequently, Zc3h10 ablation in  
53 mice impairs the thermogenic gene program, while Zc3h10 overexpression in adipose tissue  
54 enhances the thermogenic capacity and energy expenditure, protecting mice from diet-induced  
55 obesity (Yi et al., 2019).

56 As in most biological processes, BAT as well as beige fat, rely heavily on  
57 environmental cues for its full activation of the thermogenic gene program. Integrating  
58 epigenetic effectors into the thermogenic network may provide a comprehensive understanding  
59 in the regulation of thermogenic gene program (Yi et al., 2020). Here, we identify Dot1L  
60 (disruptor of telemetric silencing 1-like) as an interacting partner of Zc3h10 and a critical  
61 coactivator of thermogenic genes. Dot1L is the only known methyltransferase that catalyzes the  
62 sequential mono-, di- and tri-methylation of H3K79, which, unlike major epigenetic sites, is  
63 located at the globular domain of nucleosome (Min et al., 2003, van Leeuwen et al., 2002,  
64 Frederiks et al., 2008). Differing from other histone methyltransferases, Dot1L does not contain  
65 a SET domain but uniquely has an AdoMET motif (Feng et al., 2002, van Leeuwen et al., 2002).  
66 Dot1L is broadly known to play roles in telomere silencing, cell cycle regulations and is  
67 particularly well studied in mixed lineage leukemia (MLL)-related leukemogenesis (Schulze et  
68 al., 2009, Okada et al., 2005, Nguyen and Zhang, 2011, Ng et al., 2002). However, not much is  
69 known about Dot1L recruitment to specific sites by specific transcription factors. Nor the role of  
70 Dot1L in thermogenic gene program is known.

71 We show here that Dot1L is recruited to the UCP1 promoter region via its direct  
72 interaction with Zc3h10 for Zc3h10-mediated transcriptional activation of the UCP1 and other  
73 target genes. By using the specific chemical inhibitor of Dot1L-H3K79 methyltransferase activity,  
74 pinometostat (EPZ-5676), we demonstrate that Dot1L methyltransferase activity is required for  
75 thermogenic gene expression in vitro and in vivo. Moreover, Dot1L ablation in brown adipocytes  
76 impairs, while ectopic Dot1L expression enhances, thermogenic gene program and that Dot1L  
77 requires Zc3h10 for its function in thermogenesis. Dot1L ablation in UCP1<sup>+</sup> cells in mice impairs

78 the thermogenic capacity and lowers oxygen consumption, leading to weight gain. In this  
79 regard, the GWAS database reveals multiple SNPs of Dot1L associated with a waist-hip ratio  
80 and body mass index, further supporting a potential role of Dot1L in human obesity (GWAS  
81 Central identifier: HGVPM1111, HGVPM1114).

82

## 83 RESULTS

84

### 85 **Dot1L directly interacts with Zc3h10 for its recruitment and activation of UCP1 and other** 86 **thermogenic genes.**

87 We previously reported Zc3h10 as a BAT-enriched transcription factor that promotes the  
88 BAT gene program (Yi et al., 2019). Most transcription factors do not work alone but rather form  
89 a complex to recruit other cofactors for transcription. Thus, as a DNA-binding protein, Zc3h10  
90 may interact with coregulators to activate BAT gene transcription. Therefore, we searched for  
91 potential interacting partners of Zc3h10. The Zc3h10 with the streptavidin- and calmodulin-  
92 binding epitope-tag were incubated with nuclear extracts from BAT and the Zc3h10 complex  
93 after sequential purification were subjected to mass spectrometry. We identified multiple  
94 potential Zc3h10 interacting proteins, among which were methyltransferases and chromatin  
95 remodelers (Figure S1A). For further studying as a Zc3h10 interacting protein, we selected  
96 Dot1L (disruptor of telemetric silencing 1-like), the H3K79 methyltransferase, as it directly  
97 interacted with Zc3h10 and was the only BAT enriched gene out of the candidates tested.

98 First, for validation of interaction between Dot1L and Zc3h10, we performed Co-IP  
99 experiments with lysates of HEK293FT cells transfected with HA-Dot1L and Flag-Zc3h10 by  
100 using FLAG and HA antibodies. Indeed, we detected FLAG-Zc3h10 upon immunoprecipitation  
101 with HA antibodies. Conversely, HA-Dot1L was detected upon immunoprecipitation with FLAG  
102 antibodies (Figure 1A, left). We then tested an interaction of the two endogenous proteins using  
103 BAT from mice. Again, we detected the presence of endogenous Zc3h10 when nuclear extracts

104 of BAT from mice were immunoprecipitated with Dot1L antibody. By reverse Co-IP, we  
105 confirmed the interaction between endogenous Dot1L and Zc3h10 (Figure 1A, right). We next  
106 asked whether Dot1L can directly bind Zc3h10, by using glutathione S-transferase (GST) fused  
107 to Dot1L expressed and purified from *E. Coli* (Figure S1B). Incubation of GST-Dot1L fusion  
108 protein immobilized on glutathione beads with *in vitro* transcribed and translated [<sup>35</sup>S]-Zc3h10,  
109 but not control GST-alone, detected the presence of Zc3h10 (Figure 1B). Overall, these results  
110 demonstrate that Dot1L directly interacts with Zc3h10. We next examined domains of Dot1L for  
111 its interaction with Zc3h10. We generated three Dot1L truncated constructs; N-terminal Dot1L  
112 (1-500aa) containing the catalytic domain, the middle fragment (501-1000aa) containing the  
113 coiled-coil domain, and the C-terminal domain (1001-1540aa); All constructs were N-terminally  
114 tagged with HA. We then cotransfected these constructs with full-length Flag-tagged Zc3h10. By  
115 Co-IP, we detected the middle fragment (501 -1000) of Dot1L, that contains coiled coil motifs,  
116 interacting with Zc3h10, but not the other two regions of Dot1L (Figure 1C). We conclude that  
117 the middle fragments of Dot1L contains the Zc3h10 interacting domain.

118         Since Zc3h10 activates UCP1 and other target genes for BAT gene program and Dot1L  
119 interacts with Zc3h10, Dot1L expression pattern could be similar to Zc3h10 and thus BAT-  
120 enriched. Indeed, tissue expression profiling by RT-qPCR and immunoblotting showed that  
121 Dot1L was enriched in mouse BAT compared to other tissues tested, such as WAT, liver and  
122 stomach (Figure 1D). We next compared Dot1L mRNA levels between the stromal vascular  
123 fraction (SVF) that contains preadipocytes with adipocyte fraction of BAT from 10-wk-old wild-  
124 type (WT) mice. As expected, UCP1 was enriched in the adipocyte fraction, whereas PDGFR $\alpha$   
125 expression was higher in the SVF fraction. We found Dot1L to be enriched in the brown  
126 adipocyte fraction by over 2-fold compared to the SVF (Figure 1E, left). Moreover, similar to  
127 Zc3h10, expression of Dot1L in BAT was induced upon cold exposure (Figure 1E, right). We  
128 next examined Dot1L expression during BAT cell differentiation *in vitro*. During the course of  
129 brown adipocyte differentiation, as expected, UCP1 expression was induced, whereas

130 expression of preadipocyte gene, Pref-1, was suppressed. More importantly, similar to Zc3h10,  
131 Dot1L mRNA level was increased during BAT cell differentiation (Figure 1F). Overall, we  
132 conclude that Dot1L expression pattern is similar to Zc3h10 in terms of enrichment in mature  
133 brown adipocytes and induction by cold exposure, which may allow potential a cooperative  
134 function of Dot1L and Zc3h10 for the BAT gene program.

135         Next, to examine the functional significance of Dot1L and Zc3h10 interaction in the  
136 activation of UCP1 promoter, we performed the luciferase (Luc) reporter assay using the -5.5 kb  
137 UCP1-Luc promoter. Along with the UCP1 promoter-Luc construct, Zc3h10 and Dot1L were  
138 cotransfected into HEK293 cells. As expected, compared to empty vector control, Zc3h10 alone  
139 activated the UCP1 promoter over 3-fold. Dot1L alone could not activate the UCP1 promoter.  
140 When co-transfected with Zc3h10, Dot1L was able to synergistically activate the UCP1  
141 promoter, resulting in a robust 11-fold increase in the UCP1 promoter activity (Figure 1G, left).  
142 These results demonstrate the cooperative function of Dot1L and Zc3h10 in UCP1 promoter  
143 activation. Next, because Dot1L interacts with Zc3h10 to enhance the UCP1 promoter activity,  
144 we predicted that Dot1L should occupy the same UCP1 promoter region where Zc3h10 binds.  
145 We performed chromatin immunoprecipitation (ChIP) using BAT cells transduced with  
146 adenovirus containing Flag- tagged Zc3h10 and HA-tagged Dot1L. By using Flag (for Zc3h10)  
147 and HA (for Dot1L) antibodies, we detected strong enrichment of both Zc3h10 and Dot1L at the  
148 - 4.6 kb region of the UCP1 promoter, a region corresponding to the Zc3h10 binding site (Yi et  
149 al., 2019) (Figure 1G, right). This illustrates co-occupancy of Dot1L and Zc3h10 at the same  
150 region of the UCP1 promoter. Collectively, we demonstrate that Dot1L, as an interacting partner  
151 of Zc3h10, is a critical coactivator of the UCP1 promoter.

## Figure 1. Dot1L directly interacts with Zc3h10 for its recruitment and activation of BAT gene program

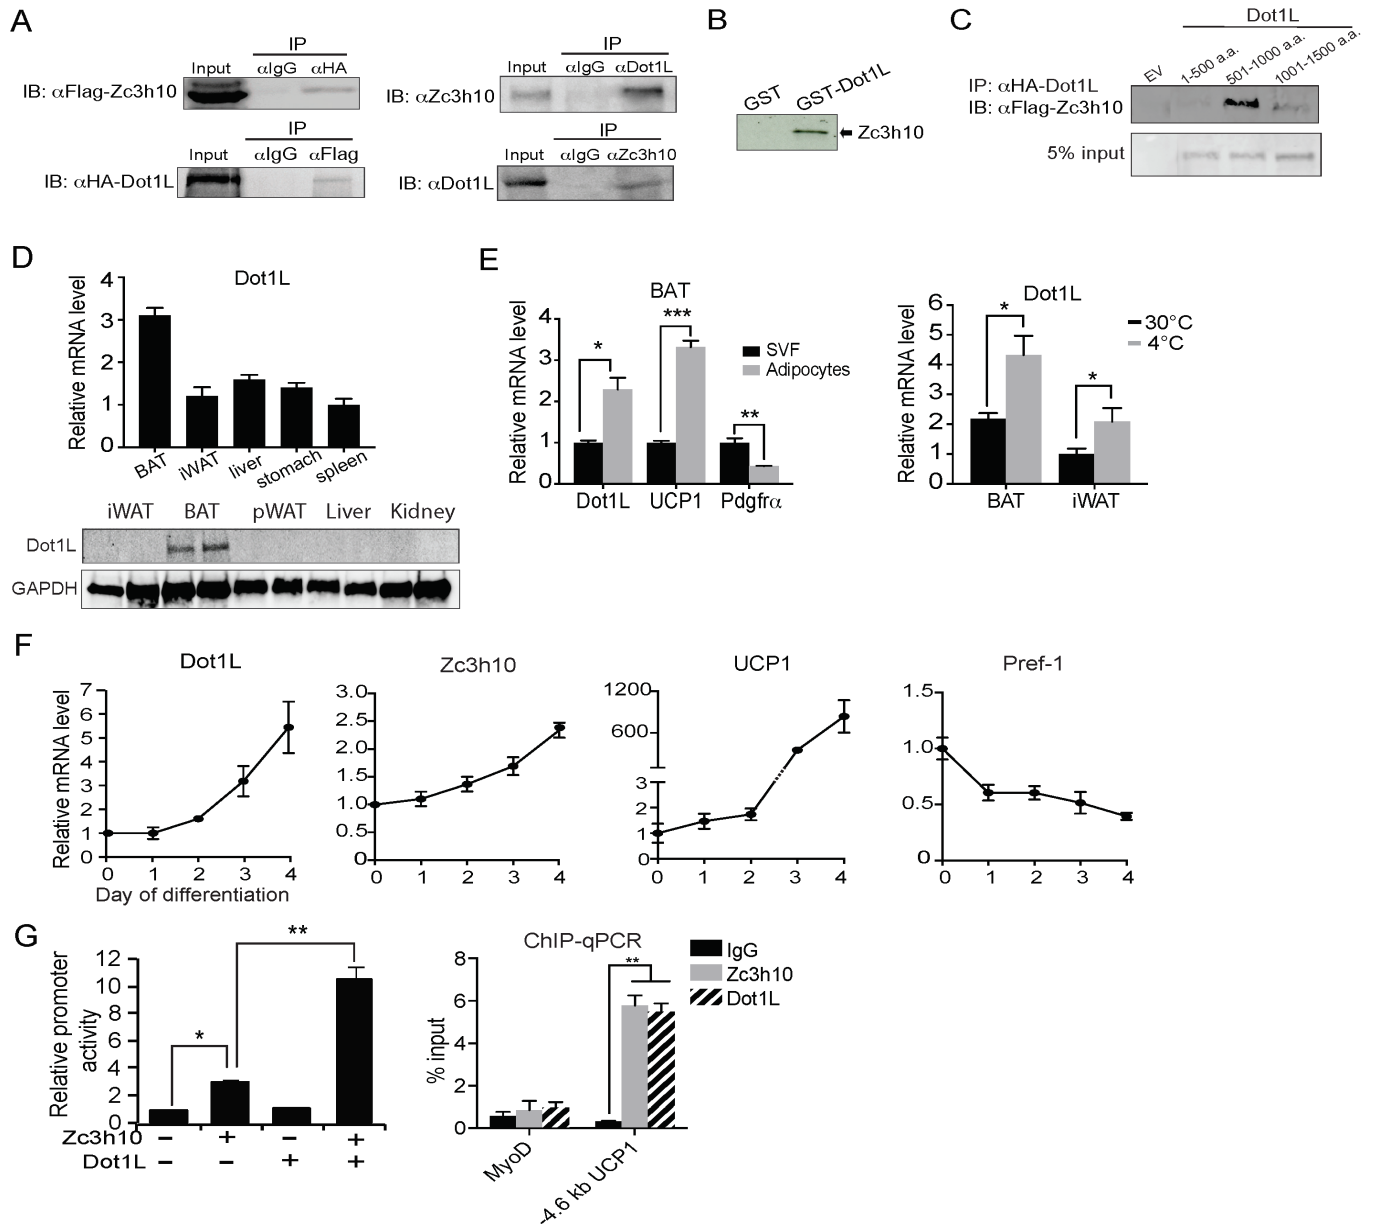

**Figure 1. Dot1L directly interacts with Zc3h10 for its recruitment and activation of BAT gene program**

(A) (Left) CoIP using  $\alpha$ Flag for Zc3h10 or  $\alpha$ HA for Dot1L after immunoprecipitation with either  $\alpha$ HA or  $\alpha$ Flag, respectively, using lysates from HEK293FT cells transfected with Flag-Zc3h10 and HA-Dot1L. (Right) CoIP of endogenous Zc3h10 and Dot1L protein using BAT tissue of C57BL/6 using  $\alpha$ Zc3h10 and  $\alpha$ Dot1L.

(B) Autoradiograph of GST pull-down using GST-Dot1L and 35S-labeled in vitro transcribed/ translated Zc3h10.

(C) CoIP using  $\alpha$ Flag for Zc3h10 after immunoprecipitation with  $\alpha$ HA for Dot1L using lysates from HEK293FT cells transfected with Flag-Zc3h10 and various HA-Dot1L constructs.

(D) RT-qPCR and western blot analysis of Dot1L in various tissues from 10-week-old C57BL/6 mice (n=5).

(E) (Left) RT-qPCR for indicated genes in the adipocyte fraction and SVF from BAT. (Right) RT-qPCR for Dot1L mRNA of BAT and iWAT from mice housed at either 30°C or 4°C (n=5).

(F) RT-qPCR for indicated genes during the course of BAT cell differentiation.

(G) (Left) HEK293FT cells were cotransfected with the -5.5kb UCP1-Luc promoter with Zc3h10 or Dot1L either together or individually (n=5).

(Right) ChIP-qPCR for Zc3h10 and Dot1L enrichment at the -4.6kb region of UCP1 promoter using Flag or HA antibodies. Differentiated BAT cells were transfected with either Flag-Zc3h10 or HA-Dot1L.

Data are expressed as means  $\pm$  standard errors of the means (SEM). \*p < 0.05, \*\*p < 0.01, \*\*\*p < 0.001.

Supplementary Figure S1 is linked to Figure 1.

153 **Dot1L is critical for the thermogenic gene program, and its action is dependent on**  
154 **Zc3h10**

155 We next tested whether Dot1L is required for BAT gene program in cultured BAT cells.  
156 BAT cells at Day 2 of differentiation were transduced with adenovirus expressing short hairpin  
157 RNAs targeting Dot1L for knockdown (Dot1L KD). Transduction of shDot1L adenovirus in BAT  
158 cells caused a decrease in Dot1L mRNA levels by approximately 60% (Figure 2A, left). While  
159 there were no apparent changes in expression of transcription factors critical for brown  
160 adipocyte differentiation, such as PPAR $\gamma$ , there was a 50% reduction in UCP1 expression at  
161 mRNA and protein levels (Figure 2A). Expression of other Zc3h10 target genes, including Tfam,  
162 Nrf1 and Elovl3, was also decreased significantly (Figure 2A, middle). Moreover, Dot1L KD BAT  
163 cells had decreased oxygen consumption rate (OCR) in oligomycin-, FCCP-, and  
164 rotenone/antimycin A-treated conditions (Figure 2B, left). Notably, the uncoupled respiration of  
165 Dot1L KD cells was significantly lower than the control BAT cells in both basal and in forskolin-  
166 stimulated conditions (Figure 2B, right). These results show that Dot1L is critical for full  
167 activation of the BAT gene program and mitochondriogenesis, and thus thermogenic function in  
168 BAT cells.

169 Next, in order to further establish the role for Dot1L in BAT gene program, we treated  
170 BAT cells with a specific inhibitor of Dot1L H3K79 methyltransferase, EPZ5676. We predicted  
171 that if Dot1L is required for the transcriptional activation of UCP1 and other BAT genes,  
172 inhibition of Dot1L activity should prevent BAT gene expression. Dot1L inhibition resulted in a  
173 significant reduction in mRNA and protein levels for UCP1 by 90% (Figure 2C). Expression of  
174 other BAT-enriched Zc3h10 target genes, such as Tfam, Nrf1, Cox7a and Cox8b, was  
175 decreased by 40-80%, whereas PPAR $\gamma$  expression was not affected (Figure 2C). These results  
176 show that Dot1L methyltransferase activity is required for thermogenic gene expression and  
177 other Zc3h10 target genes for the BAT gene program.



178 Figure 2. Dot1L is critical for the thermogenic gene program, and its action is dependent on Zc3h10

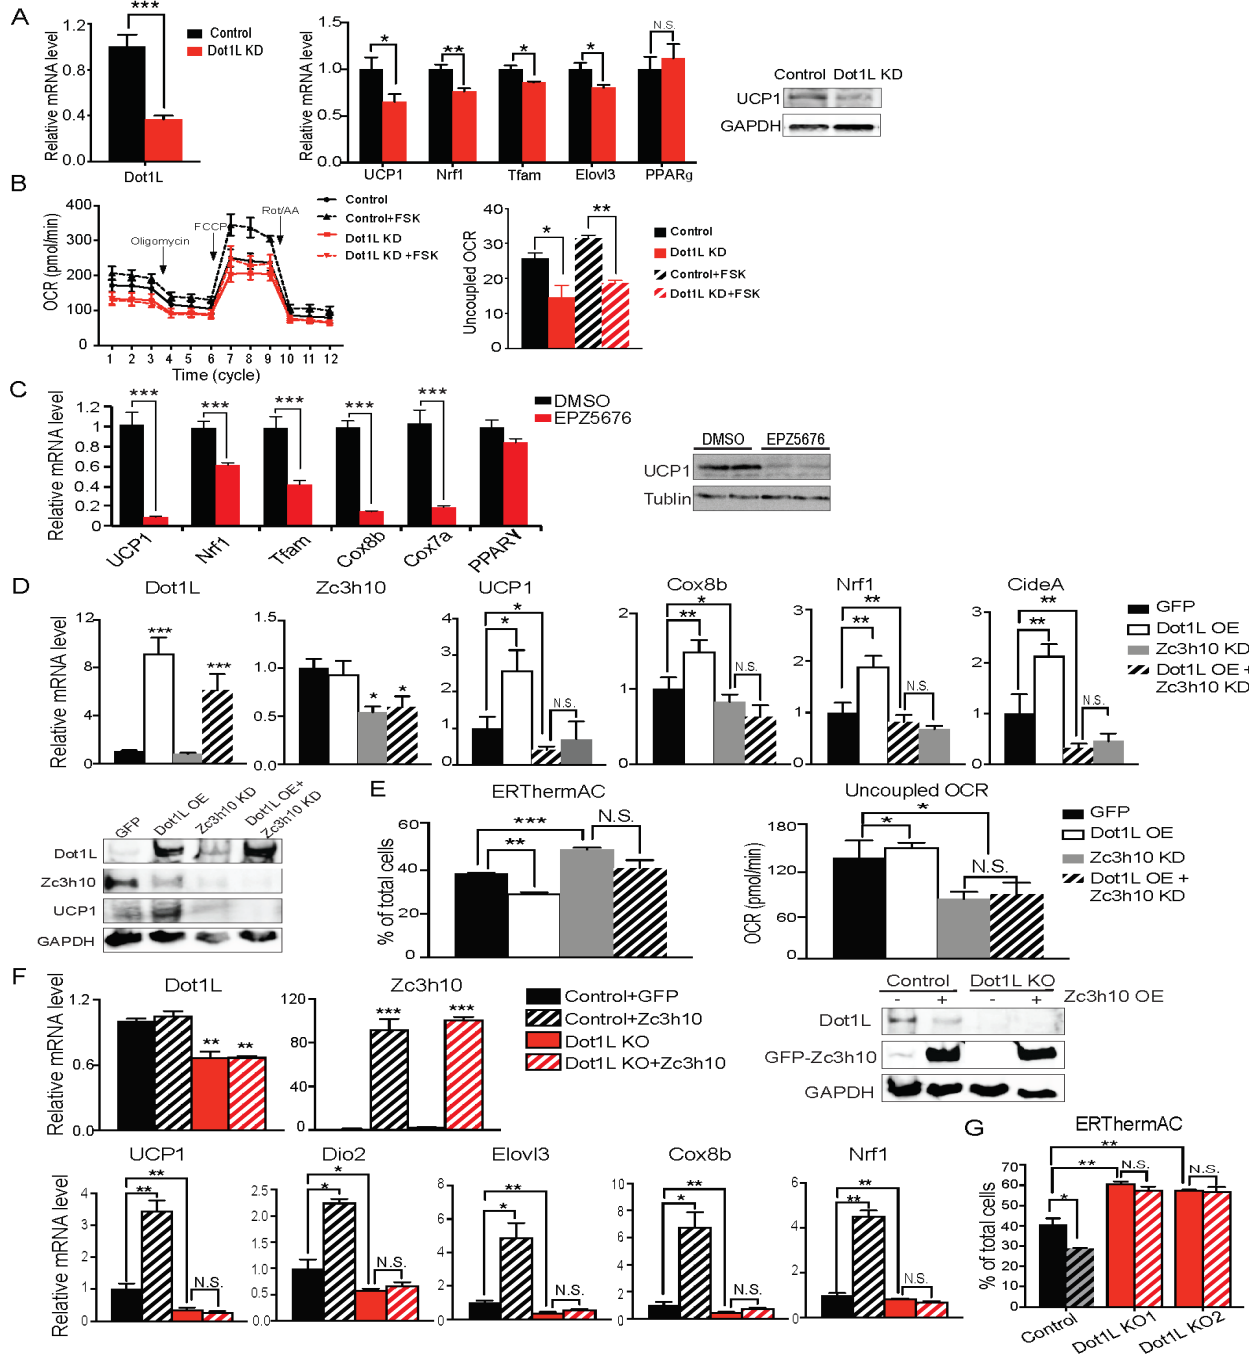

**Figure 2. Dot1L is critical for the thermogenic gene program, and its action is dependent on Zc3h10**

(A) (Left) RT-qPCR for Dot1L and thermogenic genes in BAT cells infected either scrambled (Control) or adenovirus expressing short hairpin targeting Dot1L (Dot1L KD) after D2 of adipogenic differentiation (n=6). (Right) Immunoblotting for UCP1.

(B) (Left) OCR measured in Dot1L KD cells using Seahorse XF24 analyzer (n=5). (Right) Uncoupled OCR in BAT cells infected with control or shDot1L under oligomycin (0.5uM).

(C) (Left) RT-qPCR for indicated genes in BAT cells treated with Dot1L chemical inhibitor, EPZ5676 (5nM). (Right) Western blotting analysis for UCP1 protein.

(D) (Top) RT-qPCR for indicated genes and (Bottom) immunoblotting for indicated proteins in differentiated BAT cells that were transduced with either AdGFP or AdDot1L or shZc3h10 individually or in combination for overexpression of Dot1L and knockdown of Zc3h10 (n=6). The differentiated cells were treated with forskolin (10uM) for 6 hr.

(E) (Left) FACS analysis and quantification of ERthermAC, that inversely correlates with heat production. (Right) Uncoupled OCR measured in BAT cells by Seahorse assay (n=5).

(F) RT-qPCR for indicated genes and immunoblotting for indicated proteins in the control BAT cells or Dot1L-CRISPR KO pool, overexpressing either GFP or Zc3h10.

(G) FACS analysis and quantification of ERthermAC in Zc3h10 overexpressing in the control or Dot1L-CRISPR KO pools treated with forskolin(10uM).

Data are expressed as means  $\pm$  standard errors of the means (SEM). \*p < 0.05, \*\*p < 0.01, \*\*\*p < 0.001.

Supplementary Figure S2 is linked to Figure 2.

179 To investigate whether Dot1L's function is dependent on its recruitment by Zc3h10 to  
180 thermogenic genes, we performed adenoviral overexpression of Dot1L (Dot1L OE) and  
181 knockdown of Zc3h10 (Zc3h10 KD) alone or in combination in differentiated BAT cells. We  
182 verified that Dot1L was overexpressed by over 6-fold, and Zc3h10 was knocked down by 50%  
183 at the mRNA levels and protein levels (Figure 2D). As expected, Dot1L overexpression  
184 significantly increased thermogenic gene expression including UCP1, Cox8b, CideA, while  
185 Zc3h10 KD significantly decreased these genes (Figure 2D). To examine the functional changes  
186 of thermogenic capacity in these BAT cells, we utilized a small molecule thermosensitive  
187 fluorescent dye, ERthermAC in live cells (Kriszt et al., 2017). Corresponding to an increase in  
188 temperature, ERthermAC can accumulate in the ER to decrease fluorescence and, thus,  
189 fluorescence and thermogenesis are inversely correlated. Upon forskolin treatment, the  
190 population of ERthermAC<sup>+</sup> cells in Dot1L OE cells was decreased by 10%, which indicated that  
191 the cell population with higher temperature was increased by approximately 2.5-fold (Figure 2E,  
192 Left), calculated by the percent decrease from ERthermAC<sup>+</sup> population in control cells. In  
193 contrast, ERthermAC<sup>+</sup> cells in Zc3h10 KD cells were significantly increased by 10%, indicating  
194 that Zc3h10 ablation decreased heat production in BAT cells. Moreover, Zc3h10 KD in Dot1L  
195 overexpressing cells showed low ERthermAC<sup>+</sup> cells that were similar to control cells, indicating  
196 that Zc3h10 ablation prevented Dot1L-induced thermogenesis. Furthermore, when we  
197 measured OCR by using Seahorse, Dot1L overexpression in Zc3h10 KD BAT cells had the  
198 uncoupled OCR comparable to that of Zc3h10 KD, which was significantly lower than the control  
199 cells (Figure 2E, Right). These results are in accord with the concept that Dot1L activation of  
200 thermogenic genes is dependent on Zc3h10.

201 Next, we asked whether Dot1L is required for Zc3h10-induced thermogenesis. To  
202 induce Dot1L ablation in vitro, we used Dot1L knockout (Dot1L KO) pools generated by the  
203 CRISPR inducible Cas9 system. We then overexpressed Zc3h10 in both control and the Dot1L  
204 KO pool and differentiated them. We verified that Dot1L was reduced at the mRNA levels and

205 protein levels by approximately 50% in the Dot1L KO pool, and Zc3h10 was overexpressed by  
206 more than 80-fold. We found that Dot1L KO pool had significantly decreased UCP1, Dio2,  
207 Elov3, Cox8b, and Nrf1 mRNA levels by more than 50% compared to the control BAT cells,  
208 while Zc3h10 overexpression increased thermogenic gene expression as expected (Figure 2F).  
209 Importantly, Zc3h10 overexpression in Dot1L KO pool did not rescue the decreased BAT- gene  
210 expression, remaining in significantly reduced thermogenic gene expression, an evidence that  
211 Dot1L is critical for Zc3h10-induced thermogenic gene program. We also utilized ERthermAC to  
212 test heat generation in these cells. Zc3h10 OE significantly reduced ERthermAC<sup>+</sup> population in  
213 compared to control; while two independent Dot1L KO pools had increased ERthermAC<sup>+</sup>  
214 population, indicating decreased thermogenesis (Figure 2G). Notably, Zc3h10 OE did not affect  
215 ERthermAC<sup>+</sup> population in Dot1L KO pools. Altogether, these data further show that Dot1L is  
216 required for activation of thermogenic genes by Zc3h10.

217 We then tested the ability of Dot1L to induce UCP1 and other thermogenic genes by  
218 gain of function experiment using 3T3-L1 cells. We overexpressed Dot1L or Zc3h10 alone or  
219 together via adenoviral transduction in 3T3-L1 cells and the cells were induced to browning by  
220 forskolin treatment. We first verified Zc3h10 and Dot1L overexpression by RT-qPCR and  
221 immunoblotting (Figure S2A). Interestingly, Dot1L overexpression alone increased UCP1 mRNA  
222 levels over 2-fold, probably due to the presence of endogenous Dot1L in 3T3-L1 cells. Co-  
223 overexpression of both Dot1L and Zc3h10 resulted in a further increase in UCP1 mRNA levels  
224 by 3-fold and UCP1 protein levels (Figure S2A and B). Furthermore, overexpression of Dot1L  
225 and Zc3h10 together in differentiated 3T3- L1 cells further increased mRNA levels for Tfam and  
226 Nrf1 in comparison to Dot1L or Zc3h10 alone. Expression of a terminal adipose gene, FABP4,  
227 was not significantly different in all conditions. With increased expression of UCP1 and other  
228 BAT-enriched genes upon overexpression of Dot1L and Zc3h10 (Figure S2A), we next  
229 assessed the functional consequence of the oxygen consumption. Indeed, forskolin-treated  
230 Dot1L alone overexpressing cells had somewhat increased OCR. Co-overexpression of both

231 Dot1L and Zc3h10 further increased the total OCR as well as uncoupled OCR, suggesting  
232 cooperative function of Dot1L and Zc3h10 in browning of 3T3-L1 cells (Figure S2C). Altogether,  
233 these results demonstrate that Dot1L plays a critical role in promoting thermogenic program.

234

### 235 **Inhibition of Dot1L methyltransferase activity impairs BAT gene program in vivo**

236 To study Dot1L function in vivo, we first used a selective and potent small molecule  
237 inhibitor of Dot1L, EPZ5676. We administered either saline (control) or EPZ5676 to WT mice via  
238 daily subcutaneous injection for 8 days (Figure 3A). By immunoblotting with H3K79me3  
239 antibody, we confirmed inhibition of H3K79 methylation in BAT of animals treated with EPZ5676  
240 (Figure 3B, left). Indeed, BAT from the inhibitor treated mice showed significantly decreased  
241 mRNA levels for UCP1, Nrf1, and Tfam, as well as other thermogenic genes, such as PGC1 $\alpha$   
242 and Elovl3, while no changes in adipogenic transcription factor, such as PPAR $\gamma$  (Figure 3B,  
243 middle). Also, the immunoblotting detected significantly lower UCP1 protein levels in BAT of  
244 EPZ5676 treated mice compared to the control mice (Figure 3B, middle). Similarly, EPZ5676  
245 treatment also decreased thermogenic gene expression in iWAT, WAT depot known to undergo  
246 browning (Figure 3B, right), but not in pWAT or in liver (Figure S3A).

247 Next, to investigate the physiological outcome from decreased expression of  
248 thermogenic genes, we subjected these EPZ5676 treated mice to acute cold exposure at 4°C.  
249 Both groups of mice had body temperatures around 37°C prior to the cold exposure. After 4 hrs  
250 of cold exposure, the body temperature of the EPZ5676 treated mice was 4°C lower compared  
251 to their non-treated littermates, demonstrating the significantly reduced thermogenic capacity  
252 (Figure 3C). Next, we assessed the energy expenditure by measuring the whole body O<sub>2</sub>  
253 consumption using CLAMS. Indeed, EPZ5676 treated mice had significantly lower VO<sub>2</sub> than the  
254 control mice at 4°C (Figure 3D), whereas food intake and locomotive activity were similar

255 between the two groups (Figure S3B). Altogether, these results support that Dot1L enzymatic  
256 activity is critical for activating the thermogenic gene program in vivo.

### Figure 3. Inhibition of Dot1L activity impairs BAT gene program in vivo

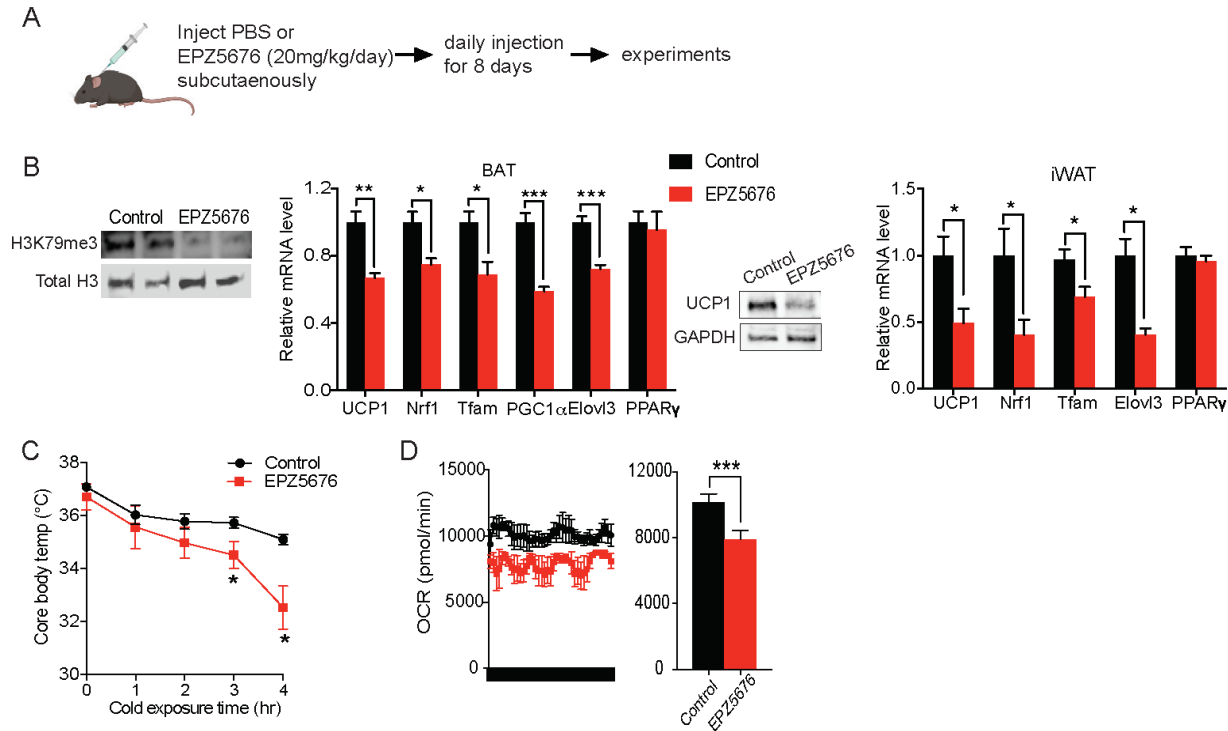

#### Figure 3. Inhibition of Dot1L activity impairs BAT gene program in vivo

(A) Schematic diagram of the strategy used to inject either Saline for control or Dot1L chemical inhibitor, EPZ5676.

(B) (Left) Immunoblotting for H3K79me3 and total H3. (Middle) RT-qPCR for indicated genes in BAT and iWAT from either PBS or EPZ5676 injected mice (n=4 per group) and immunoblotting for UCP1 protein.

(C) Rectal temperature of 14-wk old mice maintained at 4°C at indicated time points (hr) (n=4 per group).

(D) VO<sub>2</sub> assayed in mice that were housed at 4°C by indirect calorimetry using CLAMS.

Data are expressed as means  $\pm$  standard errors of the means (SEM). \*p < 0.05, \*\*p < 0.01, \*\*\*p < 0.001.

Supplementary Figure S3 is linked to Figure 3.

257

258 **The requirement of Dot1L for cold-induced thermogenesis and the Dot1L-Zc3h10**

259 **function in mice**

260 To further evaluate whether Dot1L is critical for the BAT gene program in vivo, we

261 performed Dot1L ablation in UCP1<sup>+</sup> cells in mice (Dot1L-BKO) by crossing Dot1L floxed mice

262 with UCP1-Cre mice (Figure 4A, left). We validated our mouse model by genotyping and by

263 comparing Dot1L mRNA levels in BAT and iWAT of Dot1L-BKO mice and Dot1L f/f control mice

264 (WT). Dot1L-BKO mice had a 70% reduction in Dot1L mRNA level in BAT. Dot1L-BKO mice  
265 also showed a 60% decrease in Dot1L mRNA level in iWAT, probably due to the mild cold  
266 exposure at room temperature that can induce UCP1<sup>+</sup> adipocytes in iWAT (Figure 4A, right).  
267 Importantly, UCP1 expression was significantly reduced by 40% and 60% in BAT and iWAT,  
268 respectively (Figure 4B). UCP1 protein level also was reduced significantly, as detect in BAT  
269 (Figure 4B right). In addition, expression of other BAT enriched genes, such as Dio2 and CideA,  
270 and other Zc3h10 target genes, such as Tfam and Nrf1, were all significantly decreased in BAT  
271 and iWAT of Dot1L-BKO mice, compared to WT littermates (Figure 4C).

272         Dot1L is known to be the only known H3K79 methyltransferase (VanLeeuwen, 2002).  
273 Hence, we performed CHIP-qPCR, to assess methylation status of H3K79 methylation at the  
274 Zc3h10 binding region of the UCP1 promoter using BAT of mice. Indeed, we detected a 50%  
275 reduction in di-methylation and a 70% reduction in tri-methylation of H3K79 at the -4.6 kb UCP1  
276 promoter region (Figure 4D). Thus, the decreased UCP1 mRNA level upon Dot1L ablation in  
277 BAT was correlated with decreased di-methylation and tri-methylation H3K79 at the UCP1  
278 promoter region. Similar to the -4.6 kb UCP1 promoter region, H3K79 methylation status at the -  
279 200 bp Nrf1 promoter region and at the +50 bp Tfam region was also decreased (Figure 4D).  
280 We previous reported these regions to contain Zc3h10 binding sites. The reduced H3K79  
281 methylation at Zc3h10 binding sites in BAT of Dot1L-BKO mice suggest that the recruitment of  
282 Dot1L by Zc3h10 to the target genes is important for BAT gene expression. Moreover, these  
283 observations support the notion that Dot1L participates in the transcriptional activation of UCP1  
284 and other Zc3h0 target genes by modifying H3K9 methylation status.

285

**Figure 4. The requirement of Dot1L for cold-induced thermogenesis and the Dot1L-Zc3h10 function in mice**

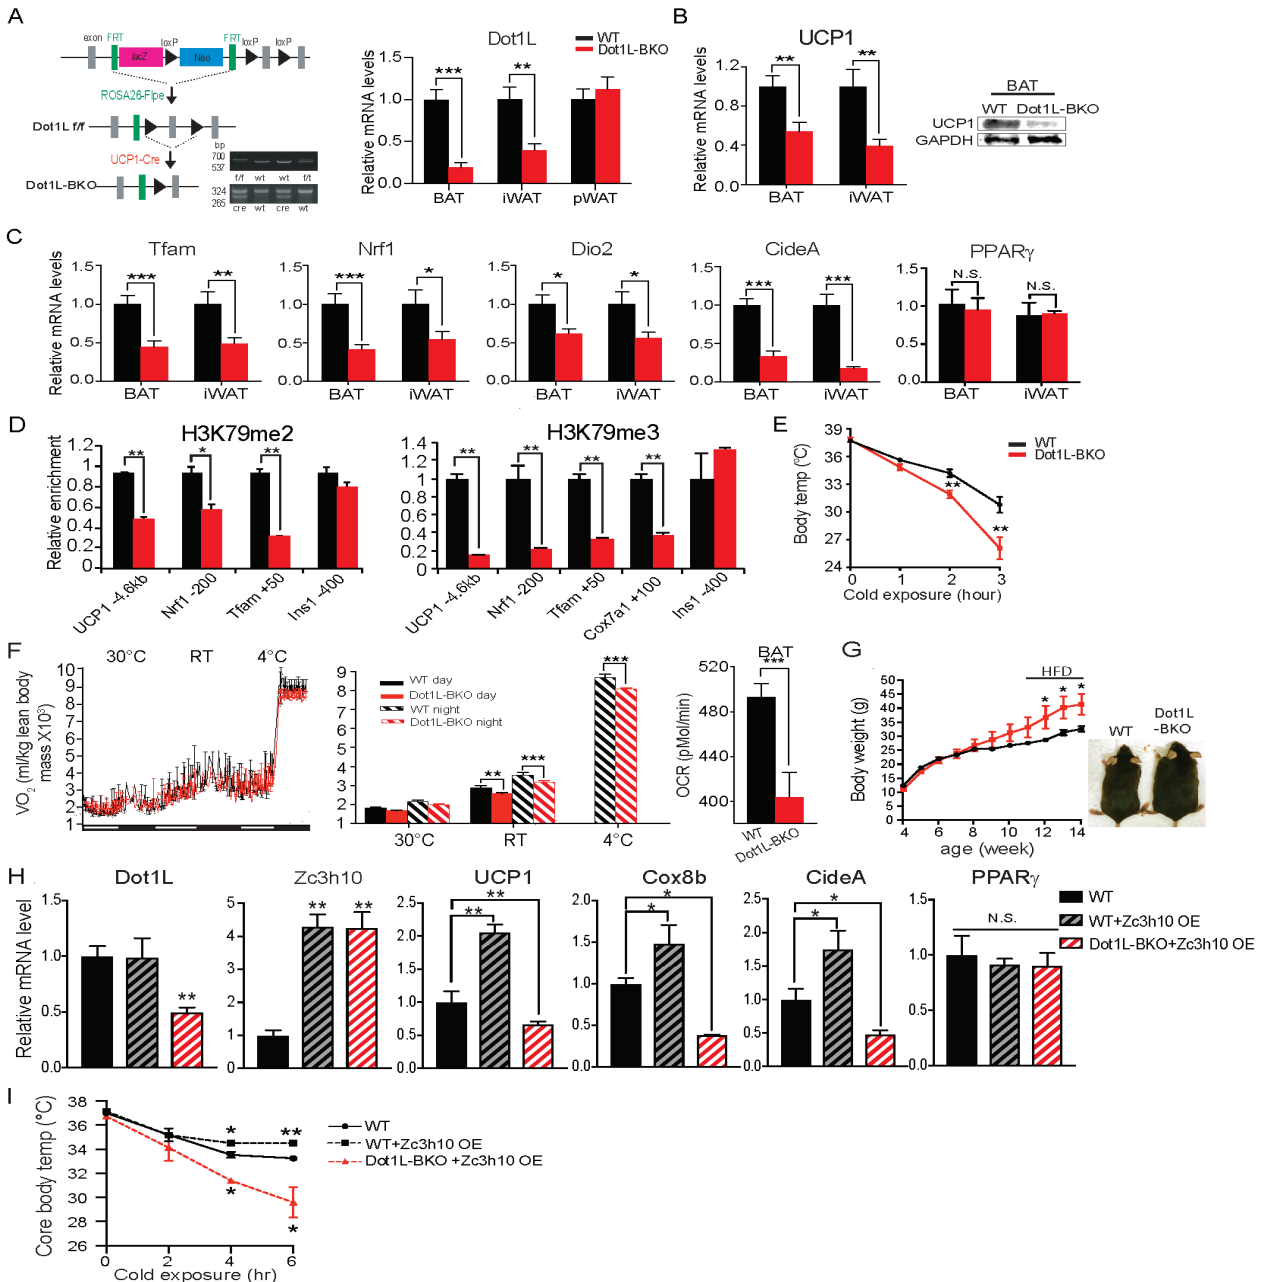

**Figure 4. The requirement of Dot1L for cold-induced thermogenesis and the Dot1L-Zc3h10 function in mice**

(A) (Left) Schematic diagram of the strategy used to generate BAT specific Dot1L conditional knockout mice. PCR genotyping of the mice: Top gel, Dot1L allele; bottom gel, Cre. (Right) RT-qPCR for Dot1L in BAT, iWAT and pWAT from Dot1L *fff* (WT) and Dot1L-BKO mice (n=6 per group).

(B) RT-qPCR and immunoblotting for UCP1 in BAT and iWAT from Dot1L *fff* (WT) and Dot1L-BKO mice.

(C) RT-qPCR for indicated genes in BAT and iWAT from Dot1L *fff* (WT) and Dot1L-BKO mice.

(D) ChIP-qPCR of H3K79me2 and H3K79me3 at Zc3h10 binding regions of BAT tissue from control (*fff*) or Dot1L-BKO mice (n=5 per group).

(E) Rectal temperature measured in 13wk-old mice at 4°C at indicated time points (hours) (n=6 mice per group).

(F) (Left) whole body VO<sub>2</sub> assayed in WT and Dot1L-BKO mice, housed at indicated ambient temperatures (n=6 per group) by indirect calorimetry using CLAMS. (Right) OCR measured in BAT of WT and Dot1L-BKO mice using Seahorse XF24 Analyzer (n=5 per group).

(G) Representative photograph of 14wk-old control and body weight of WT and Dot1L-BKO mice fed HFD from wk 12.

(H) RT-qPCR for indicated genes from WT injected with GFP or Zc3h10 adenovirus or Dot1L-BKO mice injected with Zc3h10 adenovirus for overexpression (n=5 per group).

(I) Rectal temperature measured at 4°C at indicated time points (hours) (n=5 per group).

Data are expressed as means ± standard errors of the means (SEM). \*p < 0.05, \*\*p < 0.01, \*\*\*p < 0.001.

Supplementary Figure S4 is linked to Figure 4.

286 To examine the effect of Dot1L deficiency on the thermogenic capacity, we subjected  
287 these Dot1L-BKO mice to an acute cold exposure at 4°C. While body temperatures of mice  
288 were similar initially, Dot1L-BKO mice were severely cold intolerant as their body temperature  
289 started to drop significantly after 2 hrs of cold challenge. After 3 hrs of cold exposure, the body  
290 temperature of Dot1L-BKO mice was 5°C lower than that of control mice (Figure 4E), an in vivo  
291 evidence of the requirement of Dot1L for cold-induced thermogenesis. Considering such lower  
292 thermogenic gene expression and decreased thermogenic capacity, we assessed the metabolic  
293 effect in the Dot1L-BKO mice by measuring whole body OCR using CLAMS. Indeed, the Dot1L-  
294 BKO mice had significantly reduced VO<sub>2</sub> compared to WT littermates at room temperature and  
295 at 4°C in particular, while locomotor activity and food consumption were similar (Figure 4F and  
296 Figure S4A). To examine the contribution of BAT to the altered energy expenditure in Dot1L-  
297 BKO mice, by Seahorse assay, we measured OCR in BAT dissected out from these mice. We  
298 found OCR in BAT from Dot1L-BKO mice to be decreased by 20%. (Figure 4F, right). In line  
299 with these results, we then asked whether decreased energy expenditure and impaired BAT  
300 function in Dot1L-BKO mice would be reflected in changes in adiposity. The body weights of  
301 mice started to diverge starting on wk 10, then they were maintained on a high-fat-diet (HFD)  
302 from wk 11 to wk 13 of age. By 13 wks, the Dot1L-BKO mice were approximately 8 g heavier  
303 relative to the control mice (Figure 4G), and the Dot1L-BKO had significantly larger iWAT and  
304 pWAT depots, which primarily accounted for the higher total body weights of Dot1L-BKO mice  
305 (Figure S4B). There were no differences in food/energy intake between the two genotypes  
306 despite differences in body weights. In addition, blood glucose levels of Dot1L-BKO mice on  
307 HFD were significantly higher during the course of glucose tolerance test (GTT) (Figure S4C  
308 Left), and they had significantly impaired insulin sensitivity when subjected to an insulin  
309 tolerance test (ITT) (Figure S4C, Right). Collectively, these results establish a defective BAT  
310 function and impaired thermogenic capacity that affects adiposity and consequently insulin



311 sensitivity in Dot1L-BKO mice and that Dot1L is required for the BAT thermogenic program in  
312 vivo.

313         Next, to test the in vivo relevance of Dot1L-Zc3h10 interaction to thermogenesis, we  
314 overexpressed Zc3h10 in WT and in Dot1L-BKO mice by direct injection of Zc3h10 adenovirus  
315 into BAT. We detected a 4-fold increase in Zc3h10 mRNA levels in BAT of Zc3h10 adenovirus-  
316 injected mice (Zc3h10 OE). As expected, Dot1L-BKO mice showed a 60% reduction in Dot1L  
317 mRNA levels in BAT (Figure 4H). As we previously have reported that overexpression Zc3h10  
318 in adipose tissue enhances thermogenic gene expression (Yi et al., 2019), Zc3h10  
319 overexpressing mice by injection had increased expression of BAT-enriched genes, such as  
320 UCP1, Cox8b, and CideA, compared to the control mice. More importantly, expression BAT-  
321 enriched genes remained significantly reduced in Dot1L-BKO even upon Zc3h10  
322 overexpression, while adipogenic markers, such as PPAR $\gamma$ , remained unchanged (Figure 4H).  
323 Moreover, when these mice were subjected to cold exposure, Zc3h10 OE mice had higher core  
324 body temperature compared to the control mice after 4 hrs (Figure 5I). However, Dot1L-BKO  
325 Zc3h10 OE mice were severely cold sensitive as their body temperature was significantly lower  
326 than the control and Zc3h10 OE mice. Taken together, these results demonstrate the  
327 requirement of Dot1L-Zc3h10 interaction, both in vitro and in vivo for activation of the  
328 thermogenic program in brown adipose tissue.

329

### 330 **Genome wide analysis for Dot1L effect on chromatin accessibility for thermogenic gene** 331 **program**

332         Thus far, we have shown that Dot1L-BKO mice have severely reduced thermogenic  
333 capacity due to significantly decreased BAT gene expression accompanied with reduced  
334 H3K79me2/3 at promoter regions of thermogenic genes. To study the underlying mechanism of  
335 how Dot1L ablation in BAT decreases H3K79me2/3 to decrease chromatin accessibility, thereby  
336 decreasing gene transcription, we used nuclei isolated from cold exposed Dot1L-BKO mice and

337 their littermates to assess the chromatin landscape during thermogenesis by Assay for  
338 Transposase-Accessible Chromatin (ATAC-seq). Strikingly, Dot1L-BKO had significantly  
339 reduced peaks genome wide near the transcription start sites (TSS), while WT had  
340 concentrated open chromatin regions at TSS, as H3K79 methylation is reported as a gene  
341 activation marker. (Fig 5A left). With our primary interest in assessing Dot1L's role in the  
342 regulation of thermogenesis, we compared relative ATAC-seq peaks for thermogenic genes,  
343 such as PRDM16, Zfp516, Cox8b and for mitochondria/oxidative phosphorylation, such as  
344 Cox7a1, Tfam, and Cyc1, in response to Dot1L ablation (Figure 5, middle). Also, Aifm2, Dot1L-  
345 BKO mice had much smaller peaks around promoters of UCP1, Cox8b and Elovl3 compared to  
346 WT mice (Figure 4, right), consistent with significantly decreased thermogenic gene expression  
347 in the Dot1L-BKO mice. Also, we found Dot1L-BKO had decreased expression of mitochondrial  
348 genes as well as Aifm2, a recently reported BAT-specific enzyme that converts NADH to NAD to  
349 sustain robust glycolysis to fuel thermogenesis (Nguyen et al., 2020). These data suggest that  
350 H3K79me<sub>2/3</sub> by Dot1L is important for creating a chromatin landscape permissive to  
351 transcription in BAT upon cold stimulation.

352         Next, to examine gene expression changes upon Dot1L ablation in UCP1<sup>+</sup> cells as a  
353 result of chromatin compaction, we performed RNA-seq using BAT from Dot1L-BKO mice and  
354 their littermates. Gene ontology of genes that were at least 2-fold downregulated in Dot1L-BKO  
355 mice revealed that mitochondrion organization, oxidative phosphorylation and cold-induced  
356 thermogenesis were some of the most affected processes (Figure 5B, middle). Notably, the  
357 downregulated thermogenic genes include UCP1, Cox8b, Elovl3 and PGC1 $\alpha$  as well as those  
358 related to mitochondrion organization and oxidative phosphorylation such as Nrf1, Cox20,  
359 Tomm13, and Immp21 (Figure 5B, left). With ATAC-seq results, these data suggest a  
360 mechanistic link between Dot1L-mediated chromatin remodeling and the global landscape of  
361 genome accessibility in brown fat for thermogenic gene expression. In addition, regulation of  
362 triglyceride and carbohydrate catabolism were compromised by Dot1L ablation. Conversely,

363 chromosome organization, negative regulation of telomere maintenance, response to DNA  
 364 damage were upregulated in the Dot1L knockout. In fact, we detected upregulated genes  
 365 involved in chromatin compaction and gene repression, such as HDAC3, HDAC4 and DNMT1,  
 366 further supporting that Dot1L increases chromatin accessibility (Figure 5B, right).

## Figure 5. Genome wide analysis for Dot1L effect on chromatin accessibility for the thermogenic gene program

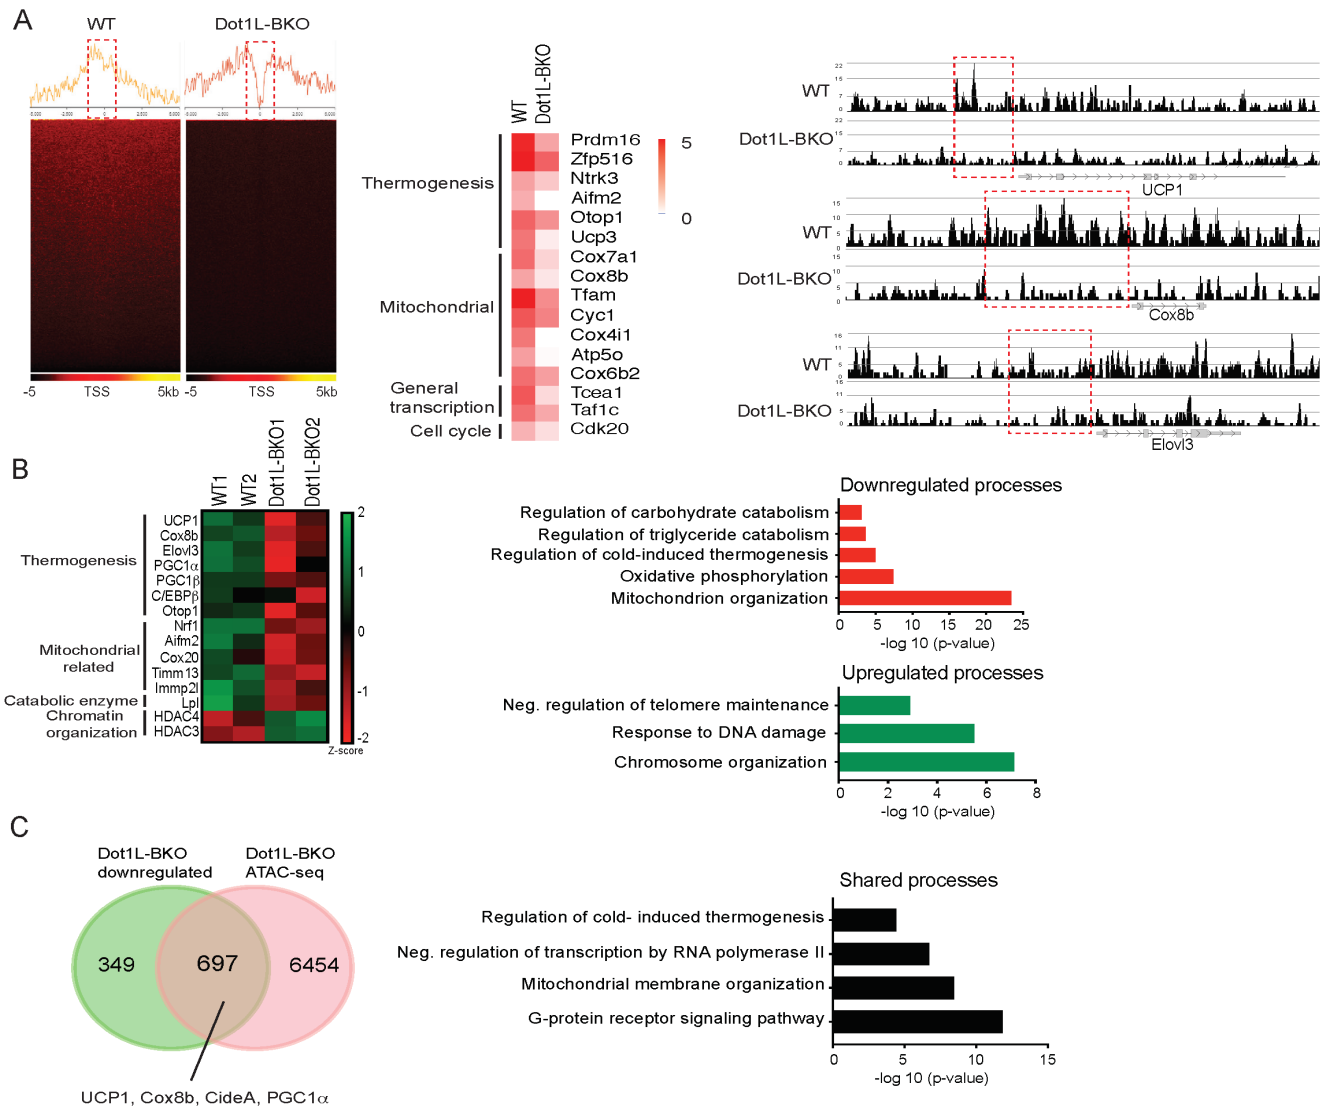

**Figure 5. Genome wide analysis for Dot1L effect on chromatin accessibility for thermogenic gene program**

(A) ATAC-seq using BAT from WT and Dot1L-BKO mice after 2 hr cold exposure  $n = 2$  per group. (Left) Heatmaps showing open chromatin regions focused at the transcription start site (TSS). Color scale shows peaks detected. (Right) UCSC genome browser screenshot of representative peaks at a subset of promoter regions of thermogenic genes.

(B) RNA-seq using BAT from WT and Dot1L-BKO mice,  $n = 2$  pooled RNA samples per group. (Left) Heatmap showing changes in gene expression. Color scale shows changes in gene expression as determined by Z-score, green is  $-2$  and red is 2. (Middle) Representative top GO terms of upregulated and downregulated genes identified by differential expression analysis.

(C) Venn diagrams showing number of unique or shared genes between ATAC- and RNA-seq datasets and charts for representative top gene ontology (GO) terms.

367 We then compared RNA-seq data to ATAC-seq obtained to identify common  
368 downregulated pathways found at lower levels using ATACs upon Dot1L ablation in UCP1+  
369 cells, and we found about 40% of the total of downregulated genes were also detected from the  
370 ATAC-seq dataset (Figure 5C, left). Some of similar processes between the two datasets  
371 include regulation of cold-induced thermogenesis, transcription initiation/elongation factors,  
372 mitochondrial membrane organization as well as G-protein receptor signaling pathway (Figure  
373 5C, right). Remarkably, the cluster of shared genes included thermogenic genes, such  
374 as UCP1, PGC1 $\alpha$ , Cox8b, CideA, further underscoring the importance of Dot1L in brown  
375 adipose tissue. This suggest that Dot1L ablation results in reduced chromatin accessibility,  
376 leading to downregulated gene expression for those specific pathways. Altogether, we conclude  
377 that H3K79me2/3 by Dot1L plays a critical role in thermogenic gene activation by increasing  
378 chromatin accessibility.

379

380

## DISCUSSION

381

382 Numerous studies have supported the concept that a network of transcription factors  
383 and epigenetic coregulators must work together to fine-tune thermogenic program in response  
384 to environmental conditions (Sambeat et al., 2017). Here, we identify Dot1L, the only known  
385 H3K79 methyltransferase, as an interacting partner of Zc3h10, a transcriptional factor that  
386 activates UCP1, as well as Tfam and Nrf1, for thermogenesis. We show that Dot1L is recruited  
387 by Zc3h10 to the UCP1 and other thermogenic genes. We demonstrate that Dot1L directly  
388 interacts with Zc3h10 to co-occupy the same region of the UCP1 promoter. Zc3h10 binds to  
389 Dot1L via the 501-1000aa fragment, which is largely composed of coiled coil domains,  
390 evolutionarily conserved and widely-known for protein-protein interactions (Mier et al., 2017).  
391 This same coiled coil domain has been reported to interact with some of mixed lineage leukemia

392 (MLL) oncogenic fusion proteins, such as AF10, to induce H3K79 methylation and constitutively  
393 activate a leukemic transcription program (Song et al., 2019). Here, we show that Dot1L is  
394 required for Zc3h10's function for thermogenic gene program. In fact, Zc3h10 overexpression  
395 could not rescue the decreased thermogenic gene expression upon Dot1L ablation in mice,  
396 demonstrating that Dot1L is critical in Zc3h10 mediated activation of thermogenesis.

397 We establish that H3K79me<sub>2/3</sub>, catalyzed by Dot1L, as an activation mark for  
398 thermogenic gene program. In this regard, previous studies reported that H3K79 methylation is  
399 strongly associated with active transcription (Steger et al., 2008, Wood et al., 2018). Our Dot1L-  
400 BKO mice showed a markedly less open chromatin regions in promoter regions of thermogenic  
401 genes. The ATAC-seq data showed significantly reduced peaks genome-wide near the  
402 transcription start sites (TSS) in BAT of Dot1L-BKO mice, compared to control mice that had  
403 concentrated open chromatin regions at TSS upon cold exposure. In addition, studies reported  
404 that H3K79me<sub>2/3</sub> may be active enhancer marks and may even be required for enhancer-  
405 promoter interactions to increase transcription (Markenscoff-Papadimitriou et al., 2014, Gilan et  
406 al., 2016, Godfrey et al., 2019). Godfrey et al. found H3K79me<sub>2/3</sub> to be abundant at a subset of  
407 super-enhancers in MLL-related leukemia cells and that a loss of H3K79me<sub>2/3</sub> by Dot1L  
408 inhibition led to significantly reduced enhancer-promoter interaction coupled with a decrease in  
409 transcription (Godfrey et al., 2019). We show that Dot1L is recruited by Zc3h10 to a UCP1  
410 upstream region of -4.6 kb, a region suggested to be one of so-called super enhancers (SEs)  
411 (Whyte et al., 2013; Harms et al., 2015). In fact, Dot1L ablation in BAT of mice resulted in a  
412 significantly reduction of H3K79me<sub>2/3</sub> at the -4.6 kb UCP1 region, correlating with decreased  
413 expression of UCP1. It is possible that H3K79me<sub>2/3</sub> catalyzed by Dot1L may be important in  
414 maintaining enhancer/promoter association for transcriptional activation.

415 Due to limited accessibility of the H3K79 residue, located in the nucleosome core, how  
416 H3K79 methylation promotes gene activation is not clearly understood (van Leeuwen et al.,  
417 2002, Lu et al., 2008). Several studies support the concept that H3K79me<sub>2/3</sub> and other well-

418 profiled gene activation marks are interdependent (Steger et al., 2008). Steger et al.  
419 demonstrated that H3K79me2/3 at gene promoters highly correlates with H3K4me1/2/3 and  
420 H3K36me3, known gene activation marks in mammalian cells. Furthermore, Chen et al.  
421 reported that Dot1L may inhibit the localization of SIRT1 and SUV39H1, a H3K9ac demethylase  
422 and a H3K9me2 methyltransferase, respectively, at MLL fusion target genes correlating with  
423 elevated H3K9ac and low H3K9me2, to maintain an open chromatin state (Chen et al., 2015).  
424 These authors proposed that H3K79me2/3 mark, in part, may function by inhibiting the histone  
425 deacetylase activity (Chen et al., 2015, Kang et al., 2018). In line with these findings, Dot1L  
426 probably works with other histone modifiers to maintain activation marks or to suppress  
427 repressive marks. Regardless, we establish that H3K79me2 and H3K79me3, in particular,  
428 function as activation marks for thermogenic gene program.

429 Overall, we demonstrate that Dot1L is critical for thermogenic program through H3K79  
430 methylation and the requirement of Dot1L-Zc3h10 interaction for brown adipose thermogenesis  
431 in vitro and in vivo. With combined ATAC-seq and RNA-seq data, we provide molecular  
432 evidence that the decreased thermogenic gene expression is due to decreased H3K79me2/3 on  
433 promoter regions of thermogenic genes, as well as genes involved in chromatin remodeling.  
434 Consequently, our mouse line of Dot1L ablated in UCP1<sup>+</sup> cells show significantly decreased  
435 expression of thermogenic genes, including UCP1, resulting in cold intolerance with decreased  
436 oxygen consumption (Figure 4C-G), leading to increased adiposity as well as insulin  
437 insensitivity.

438

## 439 MATERIALS AND METHODS

440

### 441 Animals

442 Dot1L floxed mice (Dot1<sup>l</sup>tm1a(KOMP)Wtsi) were generated by the trans-NIH Knock-Out  
443 Mouse Project (KOMP) and obtained from the KOMP Repository ([www.komp.org](http://www.komp.org)). These Dot1L

444 floxed mice were first mated with FLPe mice from Jackson Lab. FLP mediated recombination  
445 was confirmed by PCR and resultant progeny were mated with UCP1-Cre mice (B6.FVB-  
446 Tg(Ucp1-cre)1Evdr/J) from Jackson Lab. Unless otherwise stated, male mice between 10 -14  
447 weeks of age were used in experiments. Mice were fed a chow diet or a high fat diet (HFD)  
448 (45% fat derived calories- Dyets) ad libitum. EPZ-5676 was purchased from MedChemExpress  
449 (Cat. No.: HY-15593) and injected 20mg/kg/day for 8 days into BAT. All protocols for mice  
450 studies were approved from the University of California at Berkeley Animal Care and Use  
451 Committee.

452

### 453 **GST-pulldown**

454 GST-Dot1L was purchased from epicypher. GST and GST-Dot1L plasmids were  
455 transformed into BL21(DE3) E. coli (NEB) and production was induced by 0.1M IPTG treatment.  
456 Resultant proteins were purified using Glutathione Sepharose 4B (GE) according to the  
457 manufacturer's recommended protocol. [<sup>35</sup>S]-labeled Zc3h10 protein was produced by using  
458 TNT coupled transcription/translation kit (Promega). 20 ug of GST fusion proteins were  
459 incubated for 2 hrs at 4°C with in vitro translated Zc3h10 and glutathione sepharose beads. The  
460 beads were washed 3 times with binding buffer, and bound proteins were eluted by boiling in  
461 Laemmli sample buffer, separated by SDS-PAGE and analyzed by autoradiography.

462

### 463 **Tandem affinity purification (TAP) and mass spectrometry Analysis**

464 10ug of Zc3h10-CTAP or CTAP vector plasmid were transfected in 293FT cells using  
465 lipofectamine 2000 (Invitrogen). Cells were lysed and immunoprecipitated using buffers from the  
466 InterPlay Mammalian TAP system manufacturer recommended with the noted exception: after  
467 binding of the cell lysates to the Streptavidin resin, the resin was re-incubated with 200 ug of  
468 BAT nuclear extracts diluted to 1 mL in SBB overnight. TAP eluates were boiled in SDS, ran on  
469 an SDS-PAGE gel, and stained with Coomassie Brilliant Blue. Bands that were identified to be

470 specific to the Zc3h10-TAP lane were excised from both the Zc3h10-TAP and TAP vector lanes  
471 and proteins were identified by mass spectrometry performed by the Vincent J. Coates  
472 Proteomics/ Mass Spectrometry Laboratory (P/MSL) at UC Berkeley.

473

#### 474 **Cold-induced Thermogenesis**

475 Core body temperature was determined using a Physitemp BAT-12 probe at 4°C.

476

#### 477 **Indirect Calorimetry**

478 Oxygen Consumption was measured using the Comprehensive Laboratory Animal  
479 Monitoring System (CLAMS). Data were normalized to lean body mass determined by  
480 EchoMRI. Mice were individually caged and maintained under a 12 hr light/12 hr dark cycle.  
481 Food consumption and locomotor activity were tracked.

482

#### 483 **GTT and ITT**

484 For GTTs, mice were fasted overnight, and glucose (2 mg/g) was administered  
485 intraperitoneally. For ITTs, mice were fasted 4 hr, and insulin (0.75 U/kg) was administered.

486

#### 487 **Cell culture**

488 HEK293FT and 3T3-L1 cells were obtained from UCB Cell Culture Facility supported by  
489 The University of California Berkeley. The immortalized BAT cell line was from Dr. Shingo  
490 Kajimura (Harvard). Cells were grown in standard condition with 5% CO<sub>2</sub>, at 37°C. BAT cells,  
491 3T3-L1 cells and 293FT cells were maintained in DMEM containing 10% FBS and 1% pen/strep  
492 prior to differentiation/ transfection. Brown adipocyte differentiation was performed as described  
493 in (Yi et al., 2019). Ad-m-Dot1L-shRNA, Ad-Zc3h10-flag adenovirus and Ad-GFP-m-DOT1L  
494 were purchased from Vector Biolabs. Knockdown of Dot1L accomplished using adenoviral  
495 transduction of MOI of 250 at day 4 of brown adipocyte differentiation. Differentiation of 3T3-L1



496 cells was induced by treating confluent cells with DMEM containing 10% FBS, 850 nM insulin,  
497 0.5mM isobutyl-methylxanthine, 1  $\mu$ M dexamethasone, 1 nM T3, 125 nM indomethacin. After 48  
498 hrs of induction, cells were switched to a maintenance medium containing 10% FBS, 850 nM  
499 insulin and 1 nM T3. 3T3-L1 cells were infected on day 4 of differentiation using either GFP,  
500 Dot1L or Zc3h10 adenovirus. Viral medium was replaced by maintenance medium the following  
501 day. To stimulate thermogenesis, differentiated 3T3-L1 cells were treated 6 hrs with 10  $\mu$ M  
502 forskolin on day 6. Inhibition of Dot1L was accomplished by addition of either 5 nM EPZ5676  
503 (MedChemExpress, Cat. No.: HY-15593) or DMSO.

504 Inducible Lentiviral Nuclease hEF1 $\alpha$ -Blast-Cas9 (GE Healthcare) was packaged into  
505 lentivirus by using MISSION Lentiviral Packaging Mix (Sigma). BAT inducible Cas9 cell line was  
506 then generated by transduced BAT cells with inducible Cas9 lentivirus and then selected with  
507 blasticidin (10 $\mu$ g/ml). Two stable Dot1L sgRNA expressing cell lines were generated by  
508 transducing in inducible Cas9 cells with lentivirus containing two sgRNA with target sequences  
509 of GTCTCGTGCAGCATAACCAG, or ACGCCGTGTTGTATGCATCT (Abmgood) and were then  
510 selected by neomycin (400 $\mu$ g/ml). These Dot1L KO pools were subjected to brown adipocyte  
511 differentiation. After 48 hr of induction, cells were treated with doxycycline (1 $\mu$ g/ml).

512

### 513 **Oxygen consumption measurement**

514 BAT cells were differentiated in 12-well plates, trypsinized, and reseeded in XF24 plates  
515 at 50 K cells per well at day 4 of differentiation and assayed on day 5 of differentiation. On the  
516 day of experiments, the cells were washed 3 times and maintained in XF-DMEM (Sigma-  
517 Aldrich) supplemented with 1 mM sodium pyruvate and 17.5 mM glucose. Oxygen consumption  
518 was blocked by 1  $\mu$ M oligomycin. Maximal respiratory capacity was assayed by the addition of 1  
519  $\mu$ M FCCP. Tissues were incubated for 1 hr at 37°C without CO<sub>2</sub> prior to analysis on the  
520 Seahorse XF24 Analyzer. Uncoupled respiration was calculated as OCR under oligomycin  
521 treatment minus OCR under antimycin A/rotenone treatment.

## 522 **RT-qPCR Analysis and Western blotting**

523 Reverse transcription was performed with 500 ng of total RNA using SuperScript III  
524 (Invitrogen). RT-qPCR was performed in triplicate with an ABI PRISM 7500 sequence detection  
525 system (Applied Biosystems) to quantify the relative mRNA levels for various genes. Statistical  
526 analysis of the qPCR was obtained using the  $\Delta\Delta C_t$  ( $2^{-\Delta\Delta C_t}$ ) method with Eef1a1 or 18s as the  
527 control. RT-qPCR primer sets are listed in Table 1. Library generation for RNA sequencing was  
528 carried out at the Functional Genomics Laboratory at UC Berkeley.

529 For western blot analysis, total cell lysates were prepared using RIPA buffer and nuclear  
530 extracts were prepared using the NE-PER Nuclear and Cytoplasmic Extraction kit (Thermo).  
531 Proteins were separated by SDS-PAGE, transferred to nitrocellulose membrane and probed  
532 with the indicated antibodies.

533

## 534 **Antibodies**

535 The following antibodies were used where indicated: UCP1 (Abcam, 10983), Zc3h10  
536 (Thermo Fisher, PA5-31814; for immunoblotting), Zc3h10 (Abnova, H00084872-B01P; for  
537 CHIP), GAPDH (Cell signaling, 5174S), Dot1L (Bethyl, A300-953A), FLAG (Cell signaling,  
538 14793S), HA (Cell signaling, 3724S), Tubulin (Abcam, Ab52866), Histone H3 (Cell signaling,  
539 4499S), H3K79me3 (Abcam, ab2621), H3K79me2 (Abcam, ab3594)

540

## 541 **Luciferase-reporter Assay**

542 293FT cells were transfected with 300 ng Zc3h10 and/or Dot1L expression plasmid,  
543 together with 100 ng of indicated luciferase reporter construct and 0.5 ng pRL-CMV in 24-well  
544 plates. Cells were lysed 48 hr post-transfection and assayed for luciferase activity using the  
545 Dual-Luciferase Kit (Promega) according to the manufacturer's recommended protocol.

546

## 547 **Plasmid Constructs**

548 The HA-Dot1L expression vector was purchased from Genecopoeia. The Dot1L  
549 sequence was subcloned by PCR amplifying and inserting into CTAP vector from Agilent, as  
550 well as pGEX-4T-3 from GE.

551

## 552 **Coimmunoprecipitation**

553 For Co-IP experiments using tagged constructs, 293FT cells were transfected using  
554 Lipofectamine 2000 to express FLAG-tagged Zc3h10 and HA-tagged Dot1L. Cells were lysed in  
555 IP buffer containing 20 mM Tris, pH 7.4, 150 mM NaCl, 1 mM EDTA, 10% glycerol, 1% NP-40  
556 supplemented with protease inhibitors. Total cell lysates were incubated 2 hrs at 4°C with either  
557 anti-FLAG M2 for Zc3h10 or anti-HA for Dot1L. For Co-IP in brown adipose tissue of wild type  
558 mice, nuclear extraction was carried out using the NE-PER Nuclear and Cytoplasmic Extraction  
559 kit (Thermo). Equal amounts of nuclear extracts were incubated with specific antibodies and  
560 protein A/G agarose beads overnight at 4°C. Agarose beads were washed 3 times and bound  
561 proteins were eluted by boiling in Laemmli sample buffer and analysed by immunoblotting using  
562 the indicated antibodies.

563

## 564 **ChIP-qPCR**

565 ChIP was performed using ChIP kit (Cell signaling, 57976s). Briefly, BAT cells  
566 overexpressing Dot1L or Zc3h10 were fixed with disuccinimidyl glutarate (DSG) at 2 mM  
567 concentration in PBS for 45 min at room temperature before cross-linking with 1% methanol-free  
568 formaldehyde in PBS for 10 min. For ChIP experiments using BAT, tissues from 3 BATs were  
569 combined and minced on ice. The reaction was stopped by incubating with 125 mM glycine for  
570 10 min. Cells or tissues were rinsed with ice-cold phosphate-buffered saline (PBS) for 3 times,  
571 and lysed in IP lysis buffer containing 500 mM HEPES-KOH, pH 8, 1 mM EDTA, 0.5 mM EGTA,  
572 140 mM NaCl, 0.5% NP-40, 0.25% Triton X-100, 10% glycerol, and protease inhibitors for  
573 10 min at 4 °C. Nuclei were collected by centrifugation at 600 × g for 5 min at 4 °C. Nuclei were

574 released by douncing on ice and collected by centrifugation. Nuclei were then lysed in nuclei  
575 lysis buffer containing 50 mM Tris, pH 8.0, 1% SDS 10 mM EDTA supplemented with protease  
576 inhibitors, and sonicated 3 times by 20 s burst, each followed by 1 min cooling on ice. Chromatin  
577 samples were diluted 1:10 with the dilution buffer containing 16.7 mM Tris pH 8.1, 0.01% SDS  
578 1.1 % Triton X-100 1.2 mM EDTA, 1.67 mM NaCl, and proteinase inhibitor cocktail. Soluble  
579 chromatin was quantified by absorbance at 260 nm, and equivalent amounts of input DNA were  
580 immunoprecipitated using 10 µg of indicated antibodies or normal mouse IgG (Santa Cruz) and  
581 protein A/G magnetic beads (Thermo-Fisher). After the beads were washed and cross-linking  
582 reversed, DNA fragments were purified using the Simple ChIP kit (cell signaling). Samples were  
583 analyzed by qPCR using the primer sets in Table 1 for enrichment in target areas. The promoter  
584 occupancy for UCP1 and other indicated genes was confirmed by RT-qPCR. The fold  
585 enrichment values were normalized to input.

586

#### 587 **RNA-seq**

588 WT and Dot1L-BKO mice were cold exposed for 2 hrs. Total RNA from BAT was  
589 prepared using RNEasy kit (Qiagen). Strand-specific libraries were generated from 500 ng total  
590 RNA using the TruSeq Stranded Total RNA Library Prep Kit (Illumina). cDNA libraries were  
591 single-end sequenced (50 bp) on an Illumina HiSeq 2000 or 4000. Using Partek software, reads  
592 were aligned to the mouse genome (NCBI38/mm10). A gene was included in the analysis if it  
593 met all the following criteria: the maximum RPKM reached 4 unit at any time point, the gene  
594 length was >100 bp. Selected genes were induced at least +/- 1.8-fold, and the expression was  
595 significantly different from the basal ( $p < 0.05$ ).

596

#### 597 **ATAC-seq**

598 For ATAC-seq, we used two mice per condition and processed nuclei extracted from  
599 BAT separately, thus each sample analyzed was a separate biological replicate. ATAC-seq was

600 performed using Nextera DNA library Preparation kit (Illumina, 15028212) according to (Chen et  
601 al., 2018). In all,  $5 \times 10^4$  nuclei from tissues were collected in lysis buffer containing 10 mM Tris  
602 pH 7.4, 10 mM NaCl, 3 mM MgCl<sub>2</sub>, and 1% NP-40, and spun at  $500 \times g$  at 4 °C for 10 min. The  
603 pellets were resuspended in the transposase reaction mixture containing 25  $\mu$ L  
604  $2 \times$  Tagmentation buffer, 2.5  $\mu$ L transposase, and 22.5  $\mu$ L nuclease-free water, and incubated at  
605 37 °C for 30 min. The samples were purified using MinElute PCR Purification kit (Qiagen,  
606 28006) and amplification was performed in  $1 \times$  next PCR master mix (NEB, M0541S) and  
607 1.25  $\mu$ M of custom Nextera PCR primers 1 and 2 with the following PCR conditions: 72 °C for  
608 5 min; 98 °C for 30 s; and thermocycling at 98 °C for 10 s, 63 °C for 30 s, and 72 °C for 1 min.  
609 Samples were amplified for five cycles and 5  $\mu$ L of the PCR reaction was used to determine the  
610 required cycles of amplification by qPCR. The remaining 45  $\mu$ L reaction was amplified with the  
611 determined cycles and purified with MinElute PCR Purification kit (Qiagen, 28006) yielding a  
612 final library concentration of  $\sim 30$  nM in 20  $\mu$ L. Libraries were subjected to pair-end 50 bp  
613 sequencing on HiSeq4000 with 4–6 indexed libraries per lane. Partek Flow Genomics Suite was  
614 used to analyze sequencing data. Reads were aligned to mm10 genome assembly using BWA-  
615 backtrack. MACS2 in ATAC mode was then used to identify peaks from the aligned reads with a  
616 q-value cutoff of 0.05 and fold enrichment cutoff of 2.0. Quantify regions tool was used to  
617 quantify the peaks identified by MACS2 from each sample to generate a union set of regions.  
618 Regions were then annotated to RefSeq mRNA database and analysis of variance (ANOVA)  
619 was performed to determine significant peak differences between groups. UCSC genome  
620 browser was used to visualize peaks. Gene set enrichment and pathway analysis was used to  
621 highlight biological processes with the highest q-values among those identified.

622

### 623 **Statistical analysis**

624 Statistical comparisons were made using a two-tailed unpaired t-test using GraphPad  
625 Prism 8 software (GraphPad Software Inc., La Jolla, CA, USA). For genome-wide analyses, we

626 employed Partek Genomics Suite (Partek Inc., St. Louis, Missouri, USA) using ANOVA for  
627 ATAC-seq comparisons, and DESeq2 for RNA-seq differential expression comparisons, and  
628 subsequently used Gene set enrichment tool for gene ontology to identify the significantly  
629 affected pathways. Data are expressed as means  $\pm$  standard errors of the means (SEM). The  
630 statistical differences in mean values were assessed by Student's *t* test. All experiments were  
631 performed at least twice and representative data are shown.

632

### 633 **AUTHOR CONTRIBUTIONS**

634

635 D.Y. performed loss-of-function/gain-of-function studies in vitro/in vivo experiments.  
636 H.P.N. performed the interaction studies, assisted in animal studies and edited the manuscript.  
637 J.D. assisted in animal studies. J.V. made plasmid constructs and performed bioinformatics  
638 analysis and edited the manuscript. Y.X. assisted in RT-qPCR/immunoblotting. J.M.D. found  
639 and characterized Dot1L. Y.W. performed ChIP and ATAC-seq. H.S.S. designed the project and  
640 guided experiments. D.Y. and H.S.S wrote the manuscript.

641

### 642 **ACKNOWLEDGEMENTS**

643

644 We thank M. Zhu for technical assistance. The work was supported by NIH grant  
645 DK120075 to H.S.S.

646

### 647 **COMPETING INTERESTS**

648 The authors declare no competing interests.

649

650

651

652

## SUPPLEMENTARY MATERIALS

### S1. Dot1L directly interacts with Zc3h10 for UCP1 promoter activation <sup>CCO</sup>

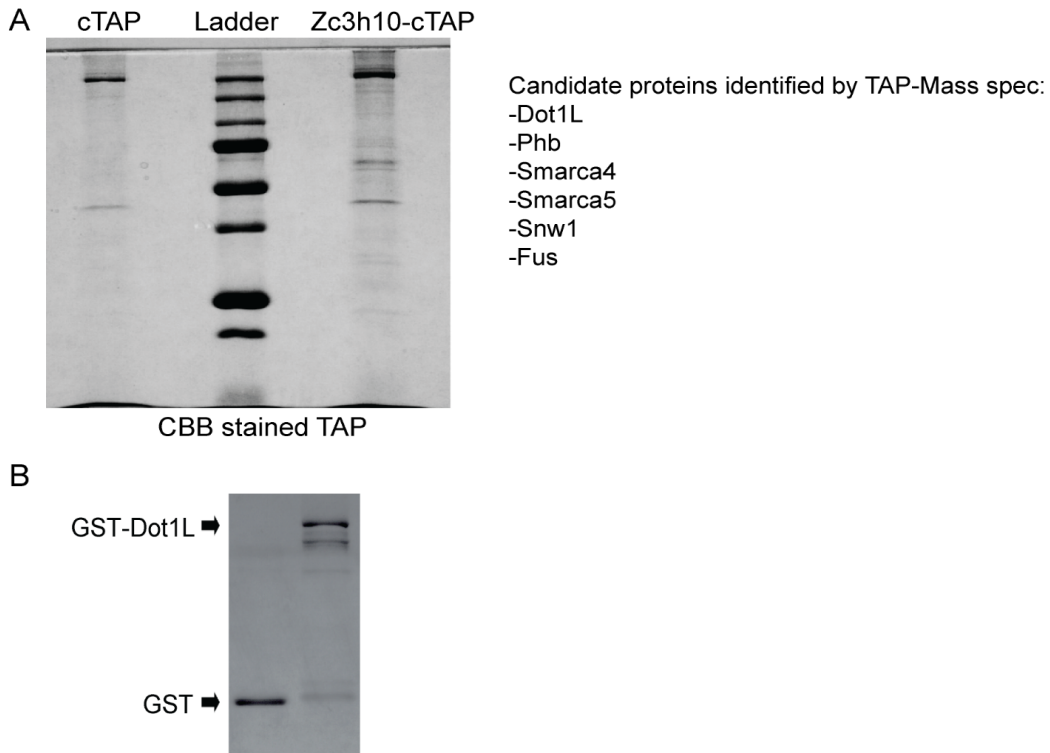

(A) Gel stained with Coomassie Blue after cTAP purification assay and a list of potential Zc3h10 interacting proteins identified by Mass spec.  
(B) Coomassie staining for GST alone and GST-Dot1L fusion protein.

## S2. Dot1L promotes the thermogenic gene program in vitro

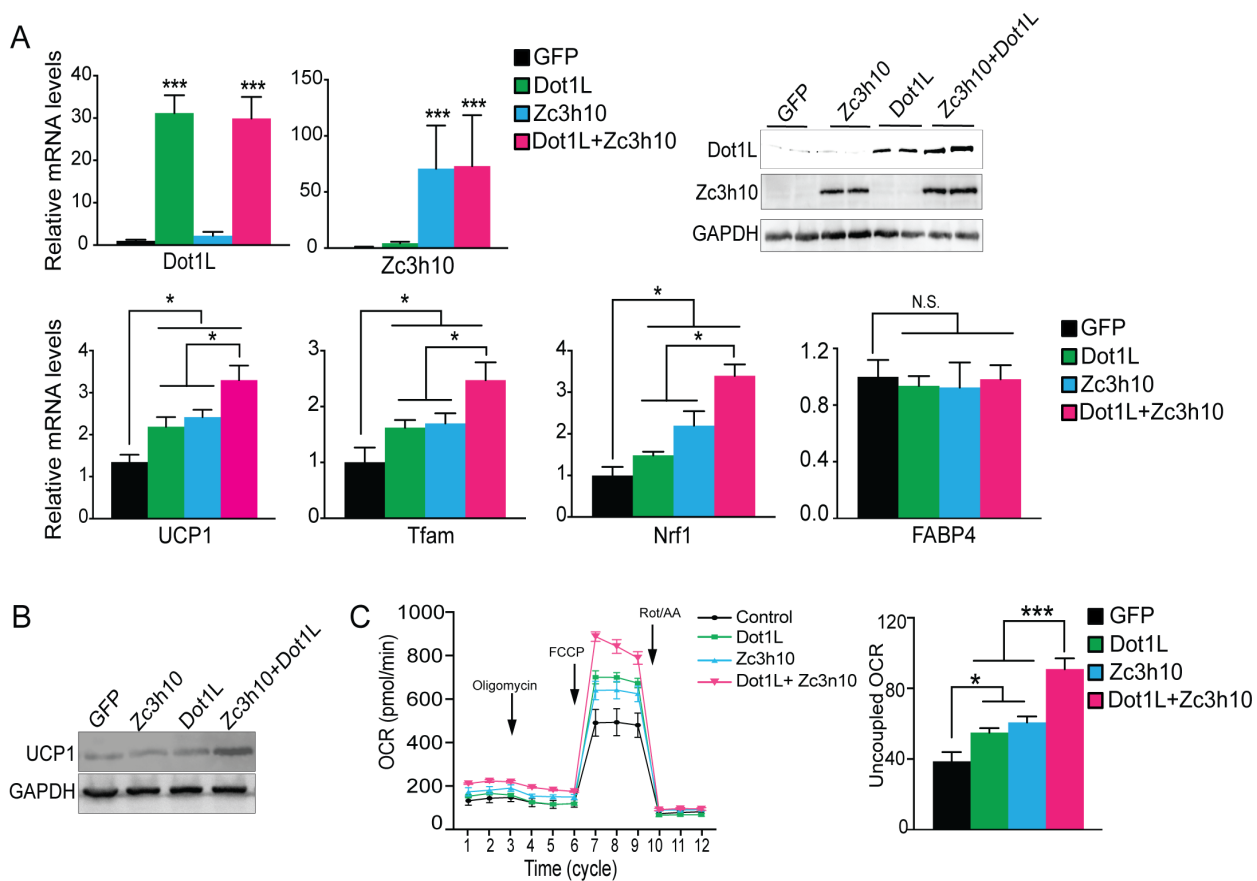

(A) RT-qPCR for indicated genes and immunoblotting for indicated proteins in 3T3-L1 cells that were transduced with either AdGFP or AdZc3h10 or AdDot1L individually or in combination for overexpression (OE) of Zc3h10 and Dot1L (n=6). The differentiated cells were treated with forskolin (10uM) for 6 hr to induce beiging.

(B) Immunoblotting for UCP1.

(C) (Left) OCR measured in Zc3h10 OE and Dot1L OE, individually and in combination in differentiated 3T3-L1 adipocytes that were induced to beiging (n=6). (Right) Uncoupled OCR under oligomycin (0.5 uM).

## S3. Inhibition of Dot1L activity impairs BAT gene program in vivo

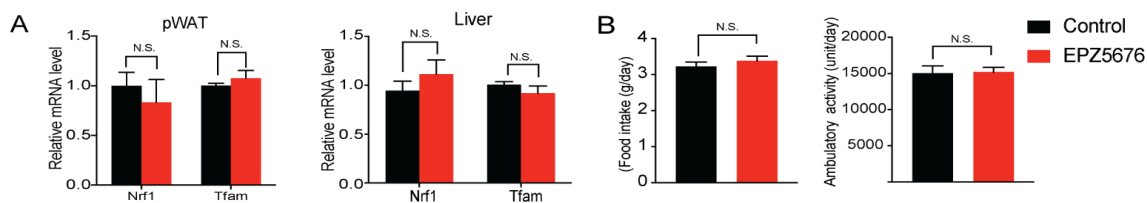

(A) RT-qPCR for indicated genes in pWAT and liver of control and EPZ5676 injected mice.

(B) Food intake and locomotor activity of control and EPZ5676 injected mice.



## S4.Dot1L is required for cold-induced thermogenesis in mice

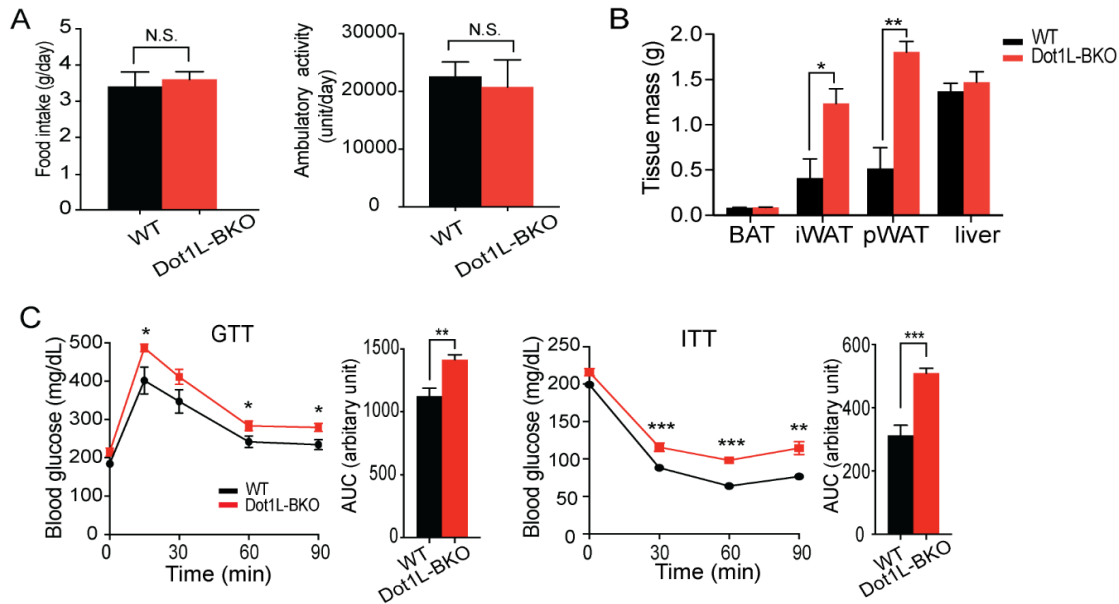

(A) Food intake and locomotor activity of WT and Dot1L-BKO mice.  
 (B) Body weight and mass of various tissues taken from WT and Dot1L-BKO mice at 14-week of age.  
 (C) GTT and ITT of Dot1L-BKO mice at 14 wk of age that were on HFD for 3 weeks (n=5).

668 **Table 1: Primer Sets used for RT-qPCR**

|               | Forward Primer                    | Reverse Primer                 |
|---------------|-----------------------------------|--------------------------------|
| Dot1L         | CGA CTA ATG CTG CAC CTC CT        | AGG AGT AGT GGT GTG GCT CA     |
| UCP1          | ACT GCC ACA CCT CCA GTC ATT       | CTT TGC CTC ACT CAG GAT TGG    |
| Tfam          | GTC CAT AGG CAC CGT ATT GC        | CCC ATG CTG GAA AAA CAC TT     |
| Zc3h10        | CGA CTA ATG CTG CAC CTC CT        | AGG AGT AGT GGT GTG GCT CA     |
| Nrf1          | GAC AAG ATC ATC AAC CTG CCT GTA G | GCT CAC TTC CTC CGG TCC TTT G  |
| Cox8b         | TGT GGG GAT CTC AGC CAT AGT       | AGT GGG CTA AGA CCC ATC CTG    |
| Cox7a1        | CAG CGT CAT GGT CAG TCT GT        | AGA AAA CCG TGT GGC AGA GA     |
| Eef1a1        | ACG AGG CAA TGT TGC TGG TGA       | GTG TGA CAA TCC AGA ACA GGA GC |
| Elov13        | TCC GCG TTC TCA TGT AGG TCT       | GGA CCT GAT GCA ACC CTA TGA    |
| PGC1 $\alpha$ | CCC TGC CAT TGT TAA GAC C         | TGC TGC TGT TCC TGT TTT C      |
| PPAR $\gamma$ | GTG CCA GTT TCG ATC CGT AGA       | GGC CAG CAT CGT GTA GAT GA     |

|                |                                |                                   |
|----------------|--------------------------------|-----------------------------------|
| CideA          | TGC TCT TCT GTA TCG CCC AGT    | GCC GTG TTA AGG AAT CTG CTG       |
| Dio2           | CAG TGT GGT GCA CGT CTC CAA TC | TGA ACC AAA GTT GAC CAC CAG       |
| FABP4          | ACA CCG AGA TTT CCT TCA AAC TG | CCA TCT AGG GTT ATG ATG CTC TTC A |
| Pdgfr $\alpha$ | CAAACCCTGAGACCAACAATG          | TCCCCAACAGTAACCCAAG               |
| UCP1-<br>4.6kb | CTC AGA GTG CAA CCC CTC AC     | GAG GTC GCA GAT CTG TTC CA        |
| Nrf1 -<br>200  | GGT CCA ATC AGA TAG CCG GG     | CCT CAC TCA TTG GTG GGT CC        |
| Tfam<br>+50    | CTC GGG CCG ACG AAT GAT G      | CGG GCT TCC CAC AGT ACC C         |
| Ins1 -<br>400  | TGA CCA ATG AGT GGG CTA CG     | CCA TTG ATA GCT GGG CCC TT        |

669

## 670 REFERENCES

671

- 672 CANNON, B. & NEDERGAARD, J. 2004. Brown adipose tissue: function and physiological  
673 significance. *Physiol Rev*, 84, 277-359.
- 674 CHEN, C. W., KOICHE, R. P., SINHA, A. U., DESHPANDE, A. J., ZHU, N., ENG, R., DOENCH,  
675 J. G., XU, H., CHU, S. H., QI, J., WANG, X., DELANEY, C., BERNT, K. M., ROOT, D.  
676 E., HAHN, W. C., BRADNER, J. E. & ARMSTRONG, S. A. 2015. DOT1L inhibits SIRT1-  
677 mediated epigenetic silencing to maintain leukemic gene expression in MLL-rearranged  
678 leukemia. *Nat Med*, 21, 335-43.
- 679 CHEN, D., LIU, W., ZIMMERMAN, J., PASTOR, W. A., KIM, R., HOSOHAMA, L., HO, J.,  
680 ASLANYAN, M., GELL, J. J., JACOBSEN, S. E. & CLARK, A. T. 2018. The TFAP2C-  
681 Regulated OCT4 Naive Enhancer Is Involved in Human Germline Formation. *Cell Rep*,  
682 25, 3591-3602 e5.
- 683 CHONDRONIKOLA, M., VOLPI, E., BORSHEIM, E., PORTER, C., ANNAMALAI, P.,  
684 ENERBACK, S., LIDELL, M. E., SARAF, M. K., LABBE, S. M., HURREN, N. M.,  
685 YFANTI, C., CHAO, T., ANDERSEN, C. R., CESANI, F., HAWKINS, H. & SIDOSSIS, L.  
686 S. 2014. Brown adipose tissue improves whole-body glucose homeostasis and insulin  
687 sensitivity in humans. *Diabetes*, 63, 4089-99.
- 688 CYPESS, A. M., LEHMAN, S., WILLIAMS, G., TAL, I., RODMAN, D., GOLDFINE, A. B., KUO,  
689 F. C., PALMER, E. L., TSENG, Y., DORIA, A., KOLODNY, G. M. & KAHN, C. R. 2009.  
690 Identification and Importance of Brown Adipose Tissue in Adult Humans. *New England*  
691 *Journal of Medicine*, 360, 1509-1517.

- 692 DEMPERSMIER, J., SAMBEAT, A., GULYAEVA, O., PAUL, S. M., HUDAK, C. S., RAPOSO, H.  
693 F., KWAN, H. Y., KANG, C., WONG, R. H. & SUL, H. S. 2015. Cold-inducible Zfp516  
694 activates UCP1 transcription to promote browning of white fat and development of brown  
695 fat. *Mol Cell*, 57, 235-46.
- 696 FARMER, S. R. 2008. Molecular determinants of brown adipocyte formation and function.  
697 *Genes Dev*, 22, 1269-75.
- 698 FENG, Q., WANG, H., NG, H. H., ERDJUMENT-BROMAGE, H., TEMPST, P., STRUHL, K. &  
699 ZHANG, Y. 2002. Methylation of H3-lysine 79 is mediated by a new family of HMTases  
700 without a SET domain. *Curr Biol*, 12, 1052-8.
- 701 FREDERIKS, F., TZOUROS, M., OUDGENOEG, G., VAN WELSEME, T., FORNEROD, M.,  
702 KRIJGSVELD, J. & VAN LEEUWEN, F. 2008. Nonprocessive methylation by Dot1 leads  
703 to functional redundancy of histone H3K79 methylation states. *Nat Struct Mol Biol*, 15,  
704 550-7.
- 705 GILAN, O., LAM, E. Y., BECHER, I., LUGO, D., CANNIZZARO, E., JOBERTY, G., WARD, A.,  
706 WIESE, M., FONG, C. Y., FTOUNI, S., TYLER, D., STANLEY, K., MACPHERSON, L.,  
707 WENG, C. F., CHAN, Y. C., GHISI, M., SMIL, D., CARPENTER, C., BROWN, P.,  
708 GARTON, N., BLEWITT, M. E., BANNISTER, A. J., KOUZARIDES, T., HUNTLY, B. J.,  
709 JOHNSTONE, R. W., DREWES, G., DAWSON, S. J., ARROWSMITH, C. H., GRANDI,  
710 P., PRINJHA, R. K. & DAWSON, M. A. 2016. Functional interdependence of BRD4 and  
711 DOT1L in MLL leukemia. *Nat Struct Mol Biol*, 23, 673-81.
- 712 GODFREY, L., CRUMP, N. T., THORNE, R., LAU, I. J., REPAPI, E., DIMOU, D., SMITH, A. L.,  
713 HARMAN, J. R., TELENIUS, J. M., OUDELAAR, A. M., DOWNES, D. J., VYAS, P.,  
714 HUGHES, J. R. & MILNE, T. A. 2019. DOT1L inhibition reveals a distinct subset of  
715 enhancers dependent on H3K79 methylation. *Nat Commun*, 10, 2803.
- 716 HIBI, M., OISHI, S., MATSUSHITA, M., YONESHIRO, T., YAMAGUCHI, T., USUI, C.,  
717 YASUNAGA, K., KATSURAGI, Y., KUBOTA, K., TANAKA, S. & SAITO, M. 2016. Brown  
718 adipose tissue is involved in diet-induced thermogenesis and whole-body fat utilization in  
719 healthy humans. *International Journal of Obesity*, 40, 1655-1661.
- 720 JIMENEZ, M. A., AKERBLAD, P., SIGVARDSSON, M. & ROSEN, E. D. 2007. Critical role for  
721 Ebf1 and Ebf2 in the adipogenic transcriptional cascade. *Mol Cell Biol*, 27, 743-57.
- 722 KANG, J. Y., KIM, J. Y., KIM, K. B., PARK, J. W., CHO, H., HAHM, J. Y., CHAE, Y. C., KIM, D.,  
723 KOOK, H., RHEE, S., HA, N. C. & SEO, S. B. 2018. KDM2B is a histone H3K79  
724 demethylase and induces transcriptional repression via sirtuin-1-mediated chromatin  
725 silencing. *FASEB J*, 32, 5737-5750.
- 726 KONG, X., BANKS, A., LIU, T., KAZAK, L., RAO, R. R., COHEN, P., WANG, X., YU, S., LO, J.  
727 C., TSENG, Y. H., CYPESS, A. M., XUE, R., KLEINER, S., KANG, S., SPIEGELMAN, B.  
728 M. & ROSEN, E. D. 2014. IRF4 is a key thermogenic transcriptional partner of PGC-  
729 1alpha. *Cell*, 158, 69-83.
- 730 KRISZT, R., ARAI, S., ITOH, H., LEE, M. H., GORALCZYK, A. G., ANG, X. M., CYPESS, A. M.,  
731 WHITE, A. P., SHAMSI, F., XUE, R., LEE, J. Y., LEE, S. C., HOU, Y., KITAGUCHI, T.,  
732 SUDHAHARAN, T., ISHIWATA, S., LANE, E. B., CHANG, Y. T., TSENG, Y. H.,  
733 SUZUKI, M. & RAGHUNATH, M. 2017. Optical visualisation of thermogenesis in  
734 stimulated single-cell brown adipocytes. *Sci Rep*, 7, 1383.
- 735 LICHTENBELT, W. D. V., VANHOMMERIG, J. W., SMULDERS, N. M., DROSSAERTS, J. M.  
736 A. F. L., KEMERINK, G. J., BOUVY, N. D., SCHRAUWEN, P. & TEULE, G. J. J. 2009.  
737 Cold-Activated Brown Adipose Tissue in Healthy Men (vol 360, pg 1500, 2009). *New*  
738 *England Journal of Medicine*, 360, 1917-1917.
- 739 LU, X., SIMON, M. D., CHODAPARAMBIL, J. V., HANSEN, J. C., SHOKAT, K. M. & LUGER, K.  
740 2008. The effect of H3K79 dimethylation and H4K20 trimethylation on nucleosome and  
741 chromatin structure. *Nat Struct Mol Biol*, 15, 1122-4.

- 742 MARKENSCOFF-PAPADIMITRIOU, E., ALLEN, W. E., COLQUITT, B. M., GOH, T., MURPHY,  
743 K. K., MONAHAN, K., MOSLEY, C. P., AHITUV, N. & LOMVARDAS, S. 2014. Enhancer  
744 interaction networks as a means for singular olfactory receptor expression. *Cell*, 159,  
745 543-57.
- 746 MIER, P., ALANIS-LOBATO, G. & ANDRADE-NAVARRO, M. A. 2017. Protein-protein  
747 interactions can be predicted using coiled coil co-evolution patterns. *J Theor Biol*, 412,  
748 198-203.
- 749 MIN, J., FENG, Q., LI, Z., ZHANG, Y. & XU, R. M. 2003. Structure of the catalytic domain of  
750 human DOT1L, a non-SET domain nucleosomal histone methyltransferase. *Cell*, 112,  
751 711-23.
- 752 NG, H. H., FENG, Q., WANG, H., ERDJUMENT-BROMAGE, H., TEMPST, P., ZHANG, Y. &  
753 STRUHL, K. 2002. Lysine methylation within the globular domain of histone H3 by Dot1  
754 is important for telomeric silencing and Sir protein association. *Genes Dev*, 16, 1518-27.
- 755 NGUYEN, A. T. & ZHANG, Y. 2011. The diverse functions of Dot1 and H3K79 methylation.  
756 *Genes Dev*, 25, 1345-58.
- 757 NGUYEN, H. P., YI, D., LIN, F., VISCARRA, J. A., TABUCHI, C., NGO, K., SHIN, G. W., LEE,  
758 A. Y. F., WANG, Y. H. & SUL, H. S. 2020. Aifm2, a NADH Oxidase, Supports Robust  
759 Glycolysis and Is Required for Cold- and Diet-Induced Thermogenesis. *Molecular Cell*,  
760 77, 600-+.
- 761 OKADA, Y., FENG, Q., LIN, Y., JIANG, Q., LI, Y., COFFIELD, V. M., SU, L., XU, G. & ZHANG,  
762 Y. 2005. hDOT1L links histone methylation to leukemogenesis. *Cell*, 121, 167-78.
- 763 PUIGSERVER, P., WU, Z., PARK, C. W., GRAVES, R., WRIGHT, M. & SPIEGELMAN, B. M.  
764 1998. A cold-inducible coactivator of nuclear receptors linked to adaptive thermogenesis.  
765 *Cell*, 92, 829-39.
- 766 RAJAKUMARI, S., WU, J., ISHIBASHI, J., LIM, H. W., GIANG, A. H., WON, K. J., REED, R. R.  
767 & SEALE, P. 2013. EBF2 determines and maintains brown adipocyte identity. *Cell*  
768 *Metab*, 17, 562-74.
- 769 SAMBEAT, A., GULYAEVA, O., DEMPERSMIER, J. & SUL, H. S. 2017. Epigenetic Regulation  
770 of the Thermogenic Adipose Program. *Trends Endocrinol Metab*, 28, 19-31.
- 771 SAMBEAT, A., GULYAEVA, O., DEMPERSMIER, J., THARP, K. M., STAHL, A., PAUL, S. M. &  
772 SUL, H. S. 2016. LSD1 Interacts with Zfp516 to Promote UCP1 Transcription and Brown  
773 Fat Program. *Cell Rep*, 15, 2536-49.
- 774 SANCHEZ-GURMACHES, J., HUNG, C. M. & GUERTIN, D. A. 2016. Emerging Complexities in  
775 Adipocyte Origins and Identity. *Trends in Cell Biology*, 26, 313-326.
- 776 SCHULZE, J. M., JACKSON, J., NAKANISHI, S., GARDNER, J. M., HENTRICH, T., HAUG, J.,  
777 JOHNSTON, M., JASPERSEN, S. L., KOBOR, M. S. & SHILATIFARD, A. 2009. Linking  
778 cell cycle to histone modifications: SBF and H2B monoubiquitination machinery and cell-  
779 cycle regulation of H3K79 dimethylation. *Mol Cell*, 35, 626-41.
- 780 SEALE, P., BJORK, B., YANG, W., KAJIMURA, S., CHIN, S., KUANG, S., SCIME, A.,  
781 DEVARAKONDA, S., CONROE, H. M., ERDJUMENT-BROMAGE, H., TEMPST, P.,  
782 RUDNICKI, M. A., BEIER, D. R. & SPIEGELMAN, B. M. 2008. PRDM16 controls a  
783 brown fat/skeletal muscle switch. *Nature*, 454, 961-7.
- 784 SONG, X., YANG, L., WANG, M., GU, Y., YE, B., FAN, Z., XU, R. M. & YANG, N. 2019. A  
785 higher-order configuration of the heterodimeric DOT1L-AF10 coiled-coil domains  
786 potentiates their leukemogenic activity. *Proc Natl Acad Sci U S A*, 116, 19917-19923.
- 787 STEGER, D. J., LEFTEROVA, M. I., YING, L., STONESTROM, A. J., SCHUPP, M., ZHUO, D.,  
788 VAKOC, A. L., KIM, J. E., CHEN, J., LAZAR, M. A., BLOBEL, G. A. & VAKOC, C. R.  
789 2008. DOT1L/KMT4 recruitment and H3K79 methylation are ubiquitously coupled with  
790 gene transcription in mammalian cells. *Mol Cell Biol*, 28, 2825-39.
- 791 VAN LEEUWEN, F., GAFKEN, P. R. & GOTTSCHLING, D. E. 2002. Dot1p modulates silencing  
792 in yeast by methylation of the nucleosome core. *Cell*, 109, 745-756.

- 793 VIRTANEN, K. A., LIDELL, M. E., ORAVA, J., HEGLIND, M., WESTERGRENN, R., NIEMI, T.,  
794 TAITTONEN, M., LAINE, J., SAVISTO, N. J., ENERBACK, S. & NUUTILA, P. 2009.  
795 Functional brown adipose tissue in healthy adults. *N Engl J Med*, 360, 1518-25.  
796 WANG, W. S. & SEALE, P. 2016. Control of brown and beige fat development. *Nature Reviews*  
797 *Molecular Cell Biology*, 17, 691-702.  
798 WOOD, K., TELLIER, M. & MURPHY, S. 2018. DOT1L and H3K79 Methylation in Transcription  
799 and Genomic Stability. *Biomolecules*, 8.  
800 YI, D., DEMPERSMIER, J. M., NGUYEN, H. P., VISCARRA, J. A., DINH, J., TABUCHI, C.,  
801 WANG, Y. & SUL, H. S. 2019. Zc3h10 Acts as a Transcription Factor and Is  
802 Phosphorylated to Activate the Thermogenic Program. *Cell Rep*, 29, 2621-2633 e4.  
803 YI, D., NGUYEN, H. P. & SUL, H. S. 2020. Epigenetic dynamics of the thermogenic gene  
804 program of adipocytes. *Biochem J*, 477, 1137-1148.  
805
